# Supplementary material for: Deciphering the temporal heterogeneity of cancer-associated fibroblast subpopulations in breast cancer
Source: PubMed Central journal article supplement (PMC8138934; doi:10.1186/s13046-021-01944-4), 2021-05-20

| Raw percentages 2-way ANOVA       |                             |                   |              |      |                  | Difference between raw and normalized data ? | Normalized to 4T1 D7 mean 2-way ANOVA |                         |                      |              |      |                  |
|-----------------------------------|-----------------------------|-------------------|--------------|------|------------------|----------------------------------------------|---------------------------------------|-------------------------|----------------------|--------------|------|------------------|
| Tukey's multiple comparisons test | Mean Diff. percentage point | 95% CI of diff.   | Significant? | *    | Adjusted P Value |                                              | Tukey's multiple comparisons test     | Mean Diff. norm. ratios | 95% CI of diff.      | Significant? | *    | Adjusted P Value |
| <b>4T1</b>                        |                             |                   |              |      |                  |                                              | <b>4T1</b>                            |                         |                      |              |      |                  |
| <b>PDGFRa</b>                     |                             |                   |              |      |                  |                                              | <b>PDGFRa</b>                         |                         |                      |              |      |                  |
| 4T1Day 7 vs. 4T1day 14            | 29.72                       | 20,23 to 39,22    | Yes          | **** | <0,0001          |                                              | 4T1Day 7 vs. 4T1day 14                | 0.65                    | 0,4848 to 0,8072     | Yes          | **** | <0,0001          |
| 4T1Day 7 vs. 4T1day 21            | 30.85                       | 21,35 to 40,34    | Yes          | **** | <0,0001          |                                              | 4T1Day 7 vs. 4T1day 21                | 0.63                    | 0,4673 to 0,7897     | Yes          | **** | <0,0001          |
| 4T1day 14 vs. 4T1day 21           | 1.12                        | -8,047 to 10,29   | No           | ns   | 0.9552           |                                              | 4T1day 14 vs. 4T1day 21               | -0.02                   | -0,1732 to 0,1382    | No           | ns   | 0.9622           |
| <b>PDGFRb</b>                     |                             |                   |              |      |                  |                                              | <b>PDGFRb</b>                         |                         |                      |              |      |                  |
| 4T1Day 7 vs. 4T1day 14            | 9.55                        | 0,05991 to 19,05  | Yes          | *    | 0.0482           |                                              | 4T1Day 7 vs. 4T1day 14                | 0.20                    | 0,04247 to 0,3649    | Yes          | **   | 0.0088           |
| 4T1Day 7 vs. 4T1day 21            | 10.50                       | 1,011 to 20,00    | Yes          | *    | 0.0259           |                                              | 4T1Day 7 vs. 4T1day 21                | 0.23                    | 0,06594 to 0,3883    | Yes          | **   | 0.0029           |
| 4T1day 14 vs. 4T1day 21           | 0.95                        | -8,219 to 10,12   | No           | ns   | 0.9677           |                                              | 4T1day 14 vs. 4T1day 21               | 0.02                    | -0,1323 to 0,1792    | No           | ns   | 0.9331           |
| <b>Podoplanin</b>                 |                             |                   |              |      |                  |                                              | <b>Podoplanin</b>                     |                         |                      |              |      |                  |
| 4T1Day 7 vs. 4T1day 14            | 17.27                       | 7,772 to 26,76    | Yes          | **** | <0,0001          |                                              | 4T1Day 7 vs. 4T1day 14                | 0.34                    | 0,1831 to 0,5055     | Yes          | **** | <0,0001          |
| 4T1Day 7 vs. 4T1day 21            | 23.78                       | 14,29 to 33,27    | Yes          | **** | <0,0001          |                                              | 4T1Day 7 vs. 4T1day 21                | 0.44                    | 0,2836 to 0,6059     | Yes          | **** | <0,0001          |
| 4T1day 14 vs. 4T1day 21           | 6.52                        | -2,656 to 15,69   | No           | ns   | 0.2175           |                                              | 4T1day 14 vs. 4T1day 21               | 0.10                    | -0,05530 to 0,2562   | No           | ns   | 0.2839           |
| <b>FAPa</b>                       |                             |                   |              |      |                  |                                              | <b>FAPa</b>                           |                         |                      |              |      |                  |
| 4T1Day 7 vs. 4T1day 14            | -8.43                       | -17,92 to 1,067   | No           | ns   | 0.0936           | yes                                          | 4T1Day 7 vs. 4T1day 14                | -0.21                   | -0,3662 to -0,04386  | Yes          | **   | 0.0082           |
| 4T1Day 7 vs. 4T1day 21            | -15.40                      | -24,89 to -5,905  | Yes          | ***  | 0.0005           |                                              | 4T1Day 7 vs. 4T1day 21                | -0.36                   | -0,5261 to -0,2037   | Yes          | **** | <0,0001          |
| 4T1day 14 vs. 4T1day 21           | -6.97                       | -16,14 to 2,199   | No           | ns   | 0.1748           | yes                                          | 4T1day 14 vs. 4T1day 21               | -0.16                   | -0,3156 to -0,004108 | Yes          | *    | 0.0427           |
| <b>aSMA</b>                       |                             |                   |              |      |                  |                                              | <b>aSMA</b>                           |                         |                      |              |      |                  |
| 4T1Day 7 vs. 4T1day 14            | 9.11                        | -0,3859 to 18,60  | No           | ns   | 0.0632           | yes                                          | 4T1Day 7 vs. 4T1day 14                | 0.36                    | 0,1987 to 0,5210     | Yes          | **** | <0,0001          |
| 4T1Day 7 vs. 4T1day 21            | 11.10                       | 1,603 to 20,59    | Yes          | *    | 0.0171           |                                              | 4T1Day 7 vs. 4T1day 21                | 0.42                    | 0,2622 to 0,5846     | Yes          | **** | <0,0001          |
| 4T1day 14 vs. 4T1day 21           | 1.99                        | -7,182 to 11,16   | No           | ns   | 0.8664           |                                              | 4T1day 14 vs. 4T1day 21               | 0.06                    | -0,09214 to 0,2193   | No           | ns   | 0.6022           |
| <b>CD26</b>                       |                             |                   |              |      |                  |                                              | <b>CD26</b>                           |                         |                      |              |      |                  |
| 4T1Day 7 vs. 4T1day 14            | -8.33                       | -17,82 to 1,166   | No           | ns   | 0.0989           | yes                                          | 4T1Day 7 vs. 4T1day 14                | -0.20                   | -0,3607 to -0,03828  | Yes          | *    | 0.0106           |
| 4T1Day 7 vs. 4T1day 21            | -9.24                       | -18,73 to 0,2539  | No           | ns   | 0.0584           | yes                                          | 4T1Day 7 vs. 4T1day 21                | -0.24                   | -0,4018 to -0,07943  | Yes          | **   | 0.0014           |
| 4T1day 14 vs. 4T1day 21           | -0.91                       | -10,08 to 8,258   | No           | ns   | 0.9702           |                                              | 4T1day 14 vs. 4T1day 21               | -0.04                   | -0,1969 to 0,1146    | No           | ns   | 0.8084           |
| <b>4T07</b>                       |                             |                   |              |      |                  |                                              | <b>4T07</b>                           |                         |                      |              |      |                  |
| <b>PDGFRa</b>                     |                             |                   |              |      |                  |                                              | <b>PDGFRa</b>                         |                         |                      |              |      |                  |
| 4T07 day 7 vs. 4T07 day 14        | 12.25                       | 2,537 to 21,97    | Yes          | **   | 0.009            |                                              | 4T07 day 7 vs. 4T07 day 14            | 0.25                    | 0,02512 to 0,4834    | Yes          | *    | 0.0254           |
| 4T07 day 7 vs. 4T07 day 21        | 5.10                        | -5,840 to 16,03   | No           | ns   | 0.5167           |                                              | 4T07 day 7 vs. 4T07 day 21            | 0.10                    | -0,1592 to 0,3565    | No           | ns   | 0.6401           |
| 4T07 day 14 vs. 4T07 day 21       | -7.16                       | -18,38 to 4,061   | No           | ns   | 0.2912           |                                              | 4T07 day 14 vs. 4T07 day 21           | -0.16                   | -0,4201 to 0,1090    | No           | ns   | 0.3504           |
| <b>PDGFRb</b>                     |                             |                   |              |      |                  |                                              | <b>PDGFRb</b>                         |                         |                      |              |      |                  |
| 4T07 day 7 vs. 4T07 day 14        | 17.08                       | 7,361 to 26,79    | Yes          | ***  | 0.0001           |                                              | 4T07 day 7 vs. 4T07 day 14            | 0.31                    | 0,08233 to 0,5406    | Yes          | **   | 0.0043           |
| 4T07 day 7 vs. 4T07 day 21        | 15.41                       | 4,473 to 26,34    | Yes          | **   | 0.0029           |                                              | 4T07 day 7 vs. 4T07 day 21            | 0.31                    | 0,04906 to 0,5648    | Yes          | *    | 0.0148           |
| 4T07 day 14 vs. 4T07 day 21       | -1.67                       | -12,89 to 9,550   | No           | ns   | 0.9346           |                                              | 4T07 day 14 vs. 4T07 day 21           | 0.00                    | -0,2691 to 0,2600    | No           | ns   | 0.9991           |
| <b>Podoplanin</b>                 |                             |                   |              |      |                  |                                              | <b>Podoplanin</b>                     |                         |                      |              |      |                  |
| 4T07 day 7 vs. 4T07 day 14        | 14.38                       | 4,664 to 24,10    | Yes          | **   | 0.0016           |                                              | 4T07 day 7 vs. 4T07 day 14            | 0.26                    | 0,02872 to 0,4869    | Yes          | *    | 0.0229           |
| 4T07 day 7 vs. 4T07 day 21        | 20.38                       | 9,446 to 31,32    | Yes          | **** | <0,0001          |                                              | 4T07 day 7 vs. 4T07 day 21            | 0.38                    | 0,1239 to 0,6396     | Yes          | **   | 0.0016           |
| 4T07 day 14 vs. 4T07 day 21       | 6.00                        | -5,218 to 17,22   | No           | ns   | 0.4194           |                                              | 4T07 day 14 vs. 4T07 day 21           | 0.12                    | -0,1407 to 0,3884    | No           | ns   | 0.5133           |
| <b>FAP</b>                        |                             |                   |              |      |                  |                                              | <b>FAP</b>                            |                         |                      |              |      |                  |
| 4T07 day 7 vs. 4T07 day 14        | -10.50                      | -20,22 to -0,7858 | Yes          | *    | 0.0305           | yes                                          | 4T07 day 7 vs. 4T07 day 14            | -0.22                   | -0,4513 to 0,006963  | No           | ns   | 0.0596           |
| 4T07 day 7 vs. 4T07 day 21        | -4.48                       | -15,42 to 6,452   | No           | ns   | 0.5994           |                                              | 4T07 day 7 vs. 4T07 day 21            | -0.13                   | -0,3872 to 0,1285    | No           | ns   | 0.4655           |
| 4T07 day 14 vs. 4T07 day 21       | 6.02                        | -5,201 to 17,24   | No           | ns   | 0.4173           |                                              | 4T07 day 14 vs. 4T07 day 21           | 0.09                    | -0,1717 to 0,3574    | No           | ns   | 0.6872           |
| <b>aSMA</b>                       |                             |                   |              |      |                  |                                              | <b>aSMA</b>                           |                         |                      |              |      |                  |
| 4T07 day 7 vs. 4T07 day 14        | 10.36                       | 0,6476 to 20,08   | Yes          | *    | 0.0334           |                                              | 4T07 day 7 vs. 4T07 day 14            | 0.34                    | 0,1111 to 0,5694     | Yes          | **   | 0.0016           |
| 4T07 day 7 vs. 4T07 day 21        | 11.80                       | 0,8686 to 22,74   | Yes          | *    | 0.0308           |                                              | 4T07 day 7 vs. 4T07 day 21            | 0.42                    | 0,1609 to 0,6766     | Yes          | ***  | 0.0005           |
| 4T07 day 14 vs. 4T07 day 21       | 1.44                        | -9,779 to 12,66   | No           | ns   | 0.9509           |                                              | 4T07 day 14 vs. 4T07 day 21           | 0.08                    | -0,1860 to 0,3431    | No           | ns   | 0.7643           |
| <b>CD26</b>                       |                             |                   |              |      |                  |                                              | <b>CD26</b>                           |                         |                      |              |      |                  |
| 4T07 day 7 vs. 4T07 day 14        | 4.44                        | -5,279 to 14,15   | No           | ns   | 0.5302           |                                              | 4T07 day 7 vs. 4T07 day 14            | 0.13                    | -0,09785 to 0,3604   | No           | ns   | 0.3693           |
| 4T07 day 7 vs. 4T07 day 21        | 18.60                       | 7,668 to 29,54    | Yes          | ***  | 0.0002           |                                              | 4T07 day 7 vs. 4T07 day 21            | 0.36                    | 0,09721 to 0,6129    | Yes          | **   | 0.0037           |
| 4T07 day 14 vs. 4T07 day 21       | 14.17                       | 2,946 to 25,38    | Yes          | **   | 0.0089           | yes                                          | 4T07 day 14 vs. 4T07 day 21           | 0.22                    | -0,04075 to 0,4884   | No           | ns   | 0.1158           |

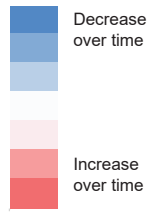

Supplement: 13046_2021_1944_MOESM6_ESM.pdf [file 13046_2021_1944_MOESM6_ESM.pdf]
