# Supplementary material for: Deciphering the temporal heterogeneity of cancer-associated fibroblast subpopulations in breast cancer
Source: PubMed Central journal article supplement (PMC8138934; doi:10.1186/s13046-021-01944-4), 2021-05-20

fig S2

**A**

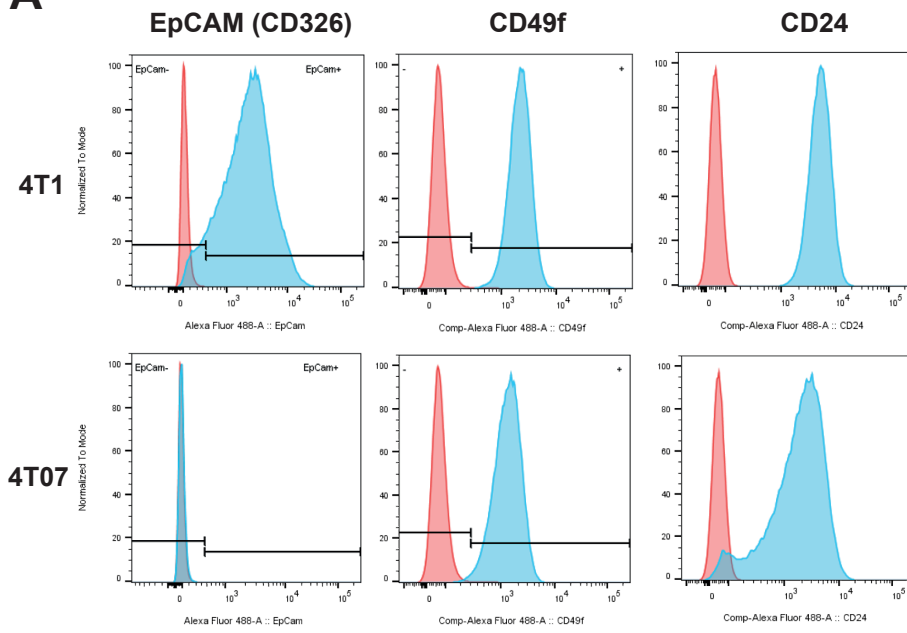

**B**

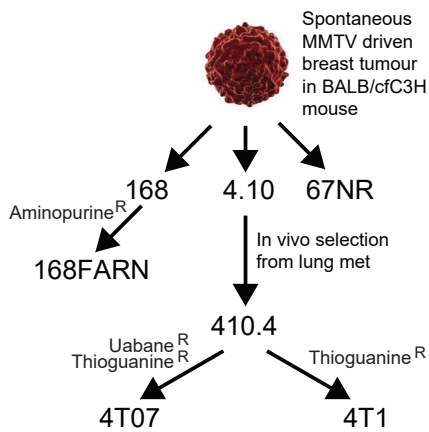

**C**

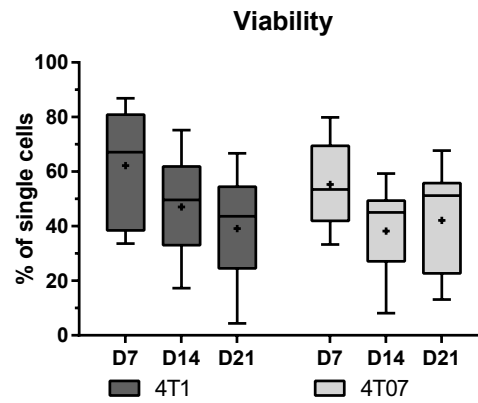

**D**

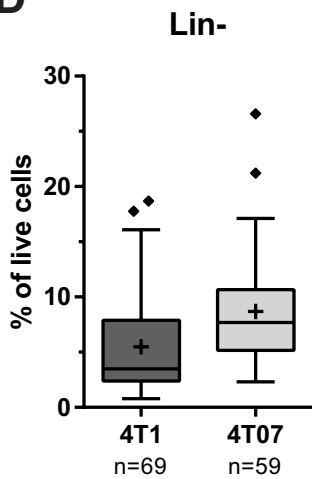

**E**

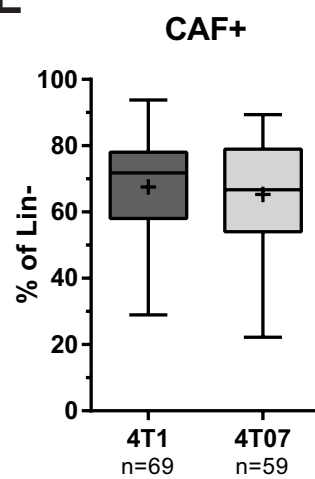

**F**

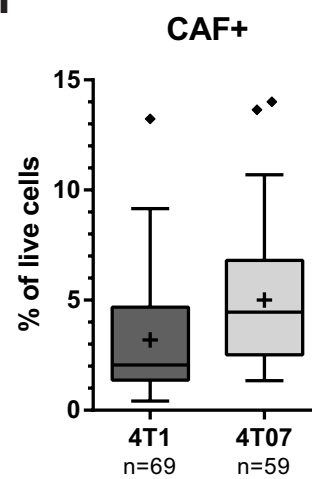

Supplement: 13046_2021_1944_MOESM2_ESM.pdf [file 13046_2021_1944_MOESM2_ESM.pdf]
