# Supplementary material for: Deciphering the temporal heterogeneity of cancer-associated fibroblast subpopulations in breast cancer
Source: PubMed Central journal article supplement (PMC8138934; doi:10.1186/s13046-021-01944-4), 2021-05-20
Supplement: 13046_2021_1944_MOESM4_ESM.pdf [file 13046_2021_1944_MOESM4_ESM.pdf]

fig S4

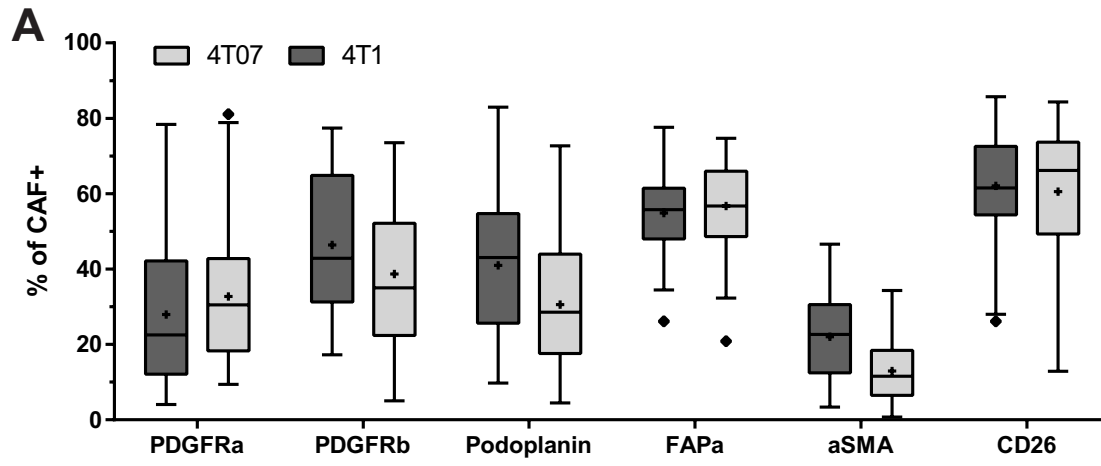

|            | 4T1    |             |             | 4T07   |             |             |
|------------|--------|-------------|-------------|--------|-------------|-------------|
|            | Median | Upper Limit | Lower Limit | Median | Upper Limit | Lower Limit |
| PDGFRa     | 22.5   | 78.4        | 4.1         | 30.5   | 81.1        | 9.4         |
| PDGFRb     | 42.8   | 77.4        | 17.2        | 35.0   | 73.5        | 5.1         |
| Podoplanin | 43.0   | 83.0        | 9.7         | 28.6   | 72.7        | 4.5         |
| FAPa       | 55.8   | 77.6        | 26.1        | 56.7   | 74.7        | 20.8        |
| aSMA       | 22.7   | 46.6        | 3.4         | 11.5   | 34.3        | 0.8         |
| CD26       | 61.5   | 85.7        | 26.1        | 66.2   | 84.3        | 12.8        |
