# Supplementary material for: Deciphering the temporal heterogeneity of cancer-associated fibroblast subpopulations in breast cancer
Source: PubMed Central journal article supplement (PMC8138934; doi:10.1186/s13046-021-01944-4), 2021-05-20

fig S5

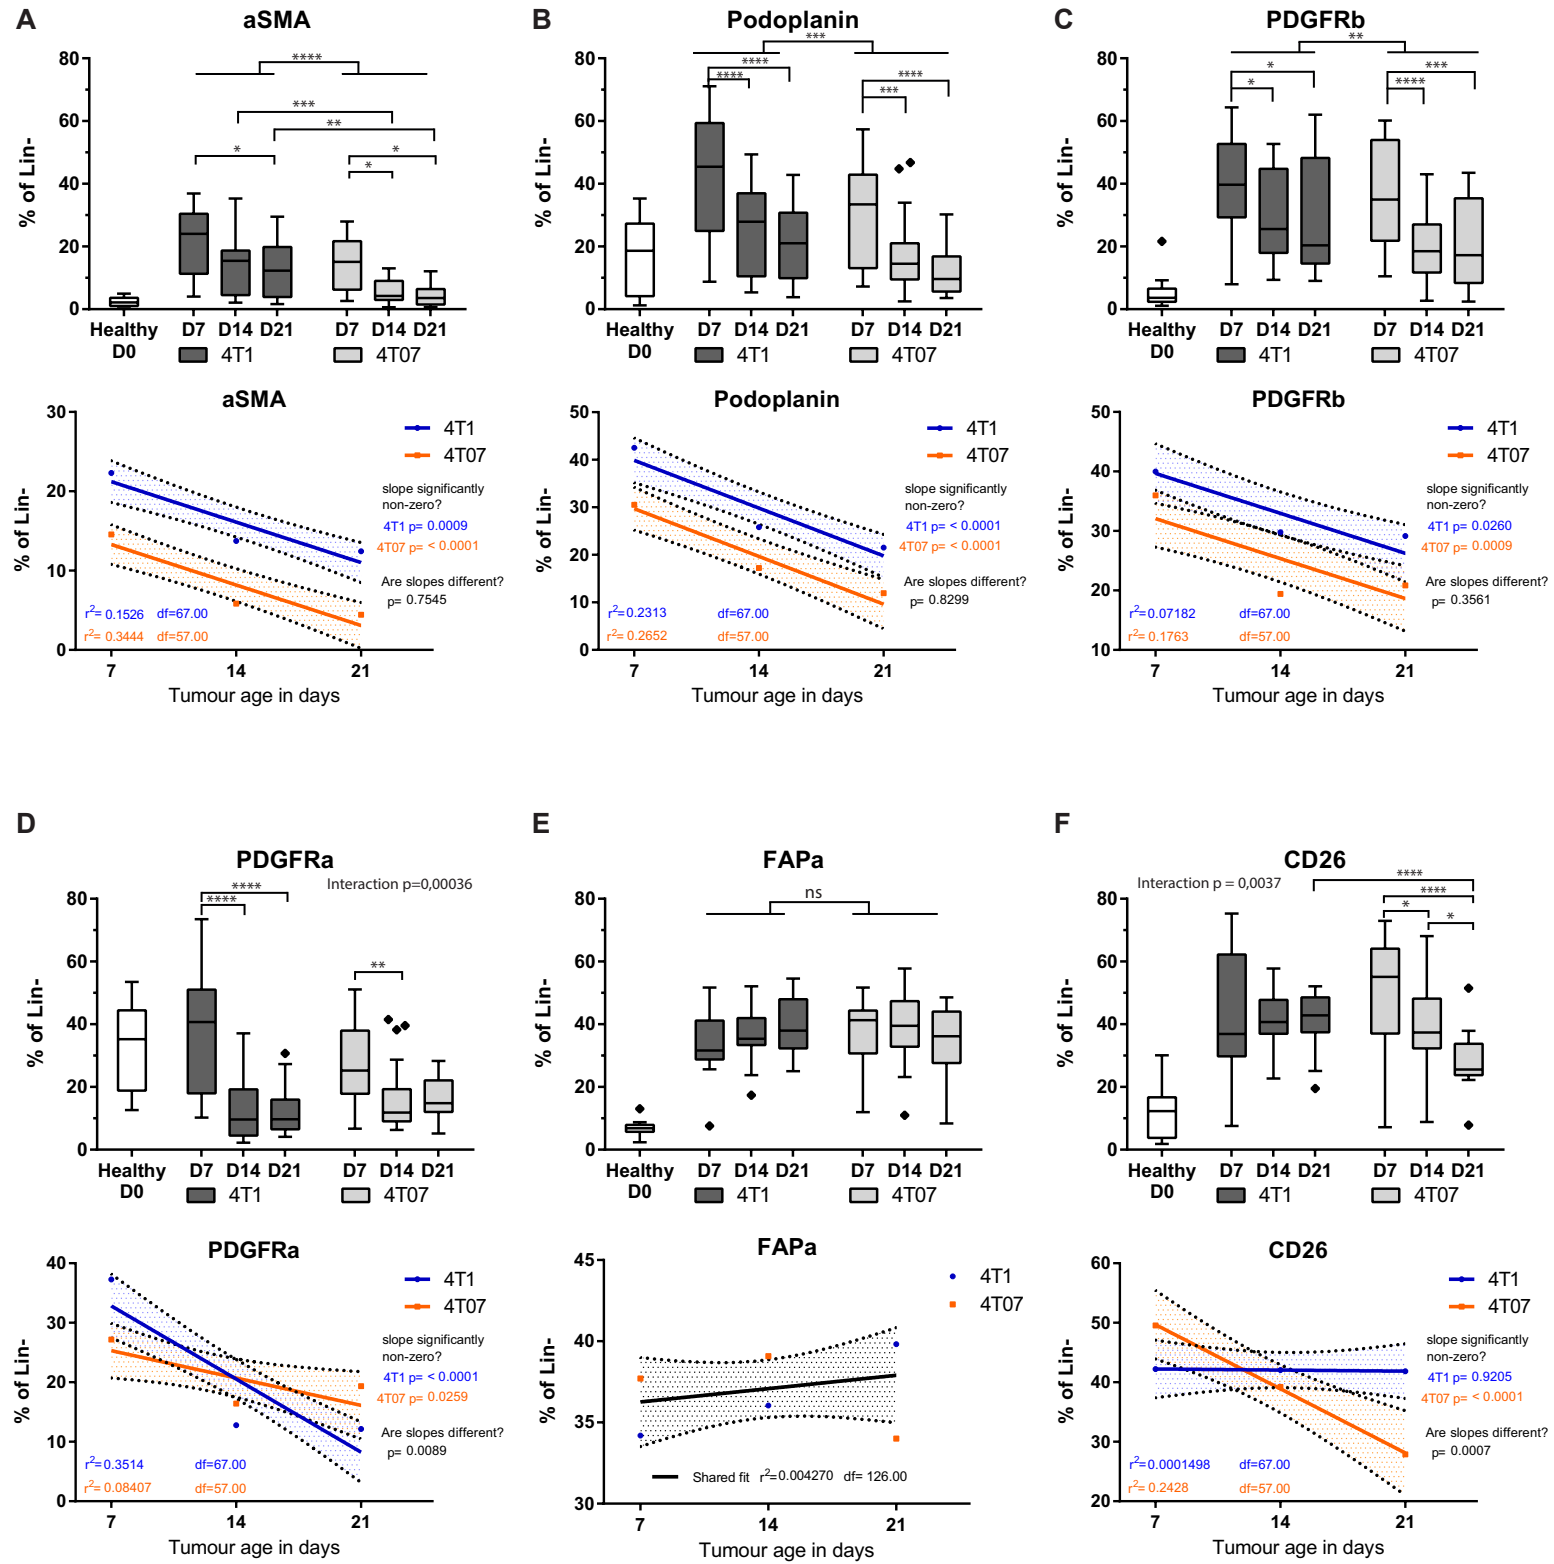

Supplement: 13046_2021_1944_MOESM5_ESM.pdf [file 13046_2021_1944_MOESM5_ESM.pdf]
