# Supplementary material for: Deciphering the temporal heterogeneity of cancer-associated fibroblast subpopulations in breast cancer
Source: PubMed Central journal article supplement (PMC8138934; doi:10.1186/s13046-021-01944-4), 2021-05-20
Supplement: 13046_2021_1944_MOESM8_ESM.pdf [file 13046_2021_1944_MOESM8_ESM.pdf]

table S1

| Table Analyzed      | Linneg all repeats   |          |                 |                    |            |
|---------------------|----------------------|----------|-----------------|--------------------|------------|
| Two-way ANOVA       | Ordinary             |          |                 |                    |            |
| Alpha               | 0.05                 |          |                 |                    |            |
| Source of Variation | % of total variation | P value  | P value summary | Significant?       |            |
| Interaction         | 2.866                | 0.1202   | ns              | No                 |            |
| day                 | 4.131                | 0.0482   | *               | Yes                |            |
| tumour type         | 12.2                 | < 0,0001 | ****            | Yes                |            |
| ANOVA table         | SS                   | DF       | MS              | F (DFn, DFd)       | P value    |
| Interaction         | 82.99                | 2        | 41.49           | F (2, 122) = 2,156 | P = 0,1202 |
| day                 | 19.6                 | 2        | 59.81           | F (2, 122) = 3,108 | P = 0,0482 |
| tumour type         | 353.4                | 1        | 353.4           | F (1, 122) = 18,36 | P < 0,0001 |
| Residual            | 2348                 | 122      | 19.25           |                    |            |

| Within each column, compare rows (simple effects within columns) |            |                   |              |             |                  |    |        |     |  |  |  |  |
|------------------------------------------------------------------|------------|-------------------|--------------|-------------|------------------|----|--------|-----|--|--|--|--|
| Number of families                                               | 2          |                   |              |             |                  |    |        |     |  |  |  |  |
| Number of comparisons per family                                 | 3          |                   |              |             |                  |    |        |     |  |  |  |  |
| Alpha                                                            | 0.05       |                   |              |             |                  |    |        |     |  |  |  |  |
| Tukey's multiple comparisons test                                | Mean Diff, | 95% CI of diff,   | Significant? | Summary     | Adjusted P Value |    |        |     |  |  |  |  |
| <b>4T1</b>                                                       |            |                   |              |             |                  |    |        |     |  |  |  |  |
| D7 vs. D14                                                       | 0.7838     | -2,326 to 3,894   | No           | ns          | 0.8215           |    |        |     |  |  |  |  |
| D7 vs. D21                                                       | -2.35      | -5,461 to 0,7599  | No           | ns          | 0.1762           |    |        |     |  |  |  |  |
| D14 vs. D21                                                      | -3.134     | -6,139 to -0,1294 | Yes          | *           | 0.0388           |    |        |     |  |  |  |  |
| <b>4T07</b>                                                      |            |                   |              |             |                  |    |        |     |  |  |  |  |
| D7 vs. D14                                                       | -2.703     | -5,813 to 0,4071  | No           | ns          | 0.1021           |    |        |     |  |  |  |  |
| D7 vs. D21                                                       | -2.561     | -6,061 to 0,9394  | No           | ns          | 0.1961           |    |        |     |  |  |  |  |
| D14 vs. D21                                                      | 0.1421     | -3,449 to 3,734   | No           | ns          | 0.9952           |    |        |     |  |  |  |  |
| Test details                                                     | Mean 1     | Mean 2            | Mean Diff,   | SE of diff, | N1               | N2 | q      | DF  |  |  |  |  |
| <b>4T1</b>                                                       |            |                   |              |             |                  |    |        |     |  |  |  |  |
| D7 vs. D14                                                       | 4.95       | 4.17              | 0.78         | 131         | 21               | 24 | 0.8456 | 122 |  |  |  |  |
| D7 vs. D21                                                       | 4.95       | 7.30              | -2.35        | 131         | 21               | 24 | 2.536  | 122 |  |  |  |  |
| D14 vs. D21                                                      | 4.17       | 7.30              | -3.13        | 127         | 24               | 24 | 3.5    | 122 |  |  |  |  |
| <b>4T07</b>                                                      |            |                   |              |             |                  |    |        |     |  |  |  |  |
| D7 vs. D14                                                       | 7.11       | 9.81              | -2.70        | 131         | 24               | 21 | 2.916  | 122 |  |  |  |  |
| D7 vs. D21                                                       | 7.11       | 9.67              | -2.56        | 148         | 24               | 14 | 2.455  | 122 |  |  |  |  |
| D14 vs. D21                                                      | 9.81       | 9.67              | 0.14         | 151         | 21               | 14 | 0.1328 | 122 |  |  |  |  |

table S2

| Table Analyzed      | CAF+ out of linneg all repeats |         |                 |                     |            |
|---------------------|--------------------------------|---------|-----------------|---------------------|------------|
| Two-way ANOVA       | Ordinary                       |         |                 |                     |            |
| Alpha               | 0.05                           |         |                 |                     |            |
|                     |                                |         |                 |                     |            |
| Source of Variation | % of total variation           | P value | P value summary | Significant?        |            |
| Interaction         | 0.32                           | 0.8064  | ns              | No                  |            |
| day                 | 10.02                          | 0.0015  | **              | Yes                 |            |
| tumour type         | 1.45                           | 0.1623  | ns              | No                  |            |
|                     |                                |         |                 |                     |            |
| ANOVA table         | SS                             | DF      | MS              | F (DFn, DFd)        | P value    |
| Interaction         | 82.83                          | 2       | 41.41           | F (2, 122) = 0.2155 | P = 0.8064 |
| day                 | 2636                           | 2       | 1318            | F (2, 122) = 6.858  | P = 0.0015 |
| tumour type         | 379.9                          | 1       | 379.9           | F (1, 122) = 1.977  | P = 0.1623 |
| Residual            | 23445                          | 122     | 192.2           |                     |            |

| Within each column, compare rows (simple effects within columns) |            |                  |              |             |                  |    |        |     |  |  |  |  |
|------------------------------------------------------------------|------------|------------------|--------------|-------------|------------------|----|--------|-----|--|--|--|--|
| Number of families                                               | 2          |                  |              |             |                  |    |        |     |  |  |  |  |
| Number of comparisons per family                                 | 3          |                  |              |             |                  |    |        |     |  |  |  |  |
| Alpha                                                            | 0.05       |                  |              |             |                  |    |        |     |  |  |  |  |
|                                                                  |            |                  |              |             |                  |    |        |     |  |  |  |  |
| Tukey's multiple comparisons test                                | Mean Diff, | 95% CI of diff,  | Significant? | Summary     | Adjusted P Value |    |        |     |  |  |  |  |
| 4T1                                                              |            |                  |              |             |                  |    |        |     |  |  |  |  |
| D7 vs. D14                                                       | 7.59       | -2,239 to 17,42  | No           | ns          | 0.1635           |    |        |     |  |  |  |  |
| D7 vs. D21                                                       | 8.45       | -1,383 to 18,27  | No           | ns          | 0.1073           |    |        |     |  |  |  |  |
| D14 vs. D21                                                      | 0.86       | -8,639 to 10,35  | No           | ns          | 0.9751           |    |        |     |  |  |  |  |
| 4T07                                                             |            |                  |              |             |                  |    |        |     |  |  |  |  |
| D7 vs. D14                                                       | 9.69       | -0,1382 to 19,52 | No           | ns          | 0.0542           |    |        |     |  |  |  |  |
| D7 vs. D21                                                       | 12.52      | 1,462 to 23,58   | Yes          | *           | 0.0223           |    |        |     |  |  |  |  |
| D14 vs. D21                                                      | 2.83       | -8,515 to 14,18  | No           | ns          | 0.8245           |    |        |     |  |  |  |  |
|                                                                  |            |                  |              |             |                  |    |        |     |  |  |  |  |
| Test details                                                     | Mean 1     | Mean 2           | Mean Diff,   | SE of diff, | N1               | N2 | q      | DF  |  |  |  |  |
| 4T1                                                              |            |                  |              |             |                  |    |        |     |  |  |  |  |
| D7 vs. D14                                                       | 73.14      | 65.55            | 7.59         | 4.14        | 21               | 24 | 2.591  | 122 |  |  |  |  |
| D7 vs. D21                                                       | 73.14      | 64.70            | 8.45         | 4.14        | 21               | 24 | 2.883  | 122 |  |  |  |  |
| D14 vs. D21                                                      | 65.55      | 64.70            | 0.86         | 4.00        | 24               | 24 | 0.3024 | 122 |  |  |  |  |
| 4T07                                                             |            |                  |              |             |                  |    |        |     |  |  |  |  |
| D7 vs. D14                                                       | 71.69      | 62.00            | 9.69         | 4.14        | 24               | 21 | 3.308  | 122 |  |  |  |  |
| D7 vs. D21                                                       | 71.69      | 59.17            | 12.52        | 4.66        | 24               | 14 | 3.799  | 122 |  |  |  |  |
| D14 vs. D21                                                      | 62.00      | 59.17            | 2.83         | 4.78        | 21               | 14 | 0.8377 | 122 |  |  |  |  |

table S3

|                            |                                           |                |                        |                     |                |
|----------------------------|-------------------------------------------|----------------|------------------------|---------------------|----------------|
| <b>Table Analyzed</b>      | <b>CAF+ out of live cells all repeats</b> |                |                        |                     |                |
| <b>Two-way ANOVA</b>       | <b>Ordinary</b>                           |                |                        |                     |                |
| <b>Alpha</b>               | <b>0.05</b>                               |                |                        |                     |                |
|                            |                                           |                |                        |                     |                |
| <b>Source of Variation</b> | <b>% of total variation</b>               | <b>P value</b> | <b>P value summary</b> | <b>Significant?</b> |                |
| Interaction                | 2.21                                      | 0.2195         | ns                     | No                  |                |
| day                        | 0.24                                      | 0.8467         | ns                     | No                  |                |
| tumour type                | 9.14                                      | 0.0005         | ***                    | Yes                 |                |
|                            |                                           |                |                        |                     |                |
| <b>ANOVA table</b>         | <b>SS</b>                                 | <b>DF</b>      | <b>MS</b>              | <b>F (DFn, DFd)</b> | <b>P value</b> |
| Interaction                | 24.46                                     | 2              | 12.23                  | F (2, 122) = 1.535  | P = 0.2195     |
| day                        | 2.655                                     | 2              | 1.327                  | F (2, 122) = 0.1667 | P = 0.8467     |
| tumour type                | 10.11                                     | 1              | 10.11                  | F (1, 122) = 12.69  | P = 0.0005     |
| Residual                   | 97.17                                     | 122            | 7.965                  |                     |                |

|                                                                         |                   |                        |                     |                    |                         |           |          |           |
|-------------------------------------------------------------------------|-------------------|------------------------|---------------------|--------------------|-------------------------|-----------|----------|-----------|
| <b>Within each column, compare rows (simple effects within columns)</b> |                   |                        |                     |                    |                         |           |          |           |
|                                                                         |                   |                        |                     |                    |                         |           |          |           |
| <b>Number of families</b>                                               | <b>2</b>          |                        |                     |                    |                         |           |          |           |
| <b>Number of comparisons per family</b>                                 | <b>3</b>          |                        |                     |                    |                         |           |          |           |
| <b>Alpha</b>                                                            | <b>0.05</b>       |                        |                     |                    |                         |           |          |           |
|                                                                         |                   |                        |                     |                    |                         |           |          |           |
| <b>Tukey's multiple comparisons test</b>                                | <b>Mean Diff,</b> | <b>95% CI of diff,</b> | <b>Significant?</b> | <b>Summary</b>     | <b>Adjusted P Value</b> |           |          |           |
|                                                                         |                   |                        |                     |                    |                         |           |          |           |
| <b>4T1</b>                                                              |                   |                        |                     |                    |                         |           |          |           |
| D7 vs. D14                                                              | 0.94              | -1.058 to 2.944        | No                  | ns                 | 0.5046                  |           |          |           |
| D7 vs. D21                                                              | -0.37             | -2.372 to 1.630        | No                  | ns                 | 0.8989                  |           |          |           |
| D14 vs. D21                                                             | -1.31             | -3.247 to 0.6188       | No                  | ns                 | 0.244                   |           |          |           |
|                                                                         |                   |                        |                     |                    |                         |           |          |           |
| <b>4T07</b>                                                             |                   |                        |                     |                    |                         |           |          |           |
| D7 vs. D14                                                              | -0.82             | -2.825 to 1.176        | No                  | ns                 | 0.5923                  |           |          |           |
| D7 vs. D21                                                              | -0.21             | -2.459 to 2.045        | No                  | ns                 | 0.9741                  |           |          |           |
| D14 vs. D21                                                             | 0.62              | -1.693 to 2.928        | No                  | ns                 | 0.8017                  |           |          |           |
|                                                                         |                   |                        |                     |                    |                         |           |          |           |
| <b>Test details</b>                                                     | <b>Mean 1</b>     | <b>Mean 2</b>          | <b>Mean Diff,</b>   | <b>SE of diff,</b> | <b>N1</b>               | <b>N2</b> | <b>q</b> | <b>DF</b> |
|                                                                         |                   |                        |                     |                    |                         |           |          |           |
| <b>4T1</b>                                                              |                   |                        |                     |                    |                         |           |          |           |
| D7 vs. D14                                                              | 3.39              | 2.45                   | 0.94                | 0.8433             | 21                      | 24        | 1.582    | 122       |
| D7 vs. D21                                                              | 3.39              | 3.76                   | -0.37               | 0.8433             | 21                      | 24        | 0.6221   | 122       |
| D14 vs. D21                                                             | 2.45              | 3.76                   | -1.31               | 0.8147             | 24                      | 24        | 2.281    | 122       |
|                                                                         |                   |                        |                     |                    |                         |           |          |           |
| <b>4T07</b>                                                             |                   |                        |                     |                    |                         |           |          |           |
| D7 vs. D14                                                              | 4.67              | 5.49                   | -0.82               | 0.8433             | 24                      | 21        | 1.383    | 122       |
| D7 vs. D21                                                              | 4.67              | 4.88                   | -0.21               | 0.9491             | 24                      | 14        | 0.3086   | 122       |
| D14 vs. D21                                                             | 5.49              | 4.88                   | 0.62                | 0.9737             | 21                      | 14        | 0.8966   | 122       |

table S4

| Multiple t-tests 4T1 vs 4T07 Lin- out of Live cells |            |          |              |               |            |                     |         |    |
|-----------------------------------------------------|------------|----------|--------------|---------------|------------|---------------------|---------|----|
| Day                                                 | Discovery? | P value  | Mean1<br>4T1 | Mean2<br>4T07 | Difference | SE of<br>difference | t ratio | df |
| D7                                                  |            | 0.039520 | 4.95         | 7.11          | -2.15      | 1.01                | 2.12    | 43 |
| D14                                                 | *          | 0.000243 | 4.17         | 9.81          | -5.64      | 1.41                | 4.00    | 43 |
| D21                                                 |            | 0.168074 | 7.30         | 9.67          | -2.36      | 1.68                | 1.41    | 36 |

| Multiple t-tests 4T1 vs 4T07 CAF+ out of Lin- cells |            |          |              |               |            |                     |         |    |
|-----------------------------------------------------|------------|----------|--------------|---------------|------------|---------------------|---------|----|
| Day                                                 | Discovery? | P value  | Mean1<br>4T1 | Mean2<br>4T07 | Difference | SE of<br>difference | t ratio | df |
| D7                                                  |            | 0.761085 | 73.14        | 71.69         | 1.45       | 4.74                | 0.31    | 43 |
| D14                                                 |            | 0.273681 | 65.55        | 62.00         | 3.55       | 3.20                | 1.11    | 43 |
| D21                                                 |            | 0.268840 | 64.70        | 59.17         | 5.53       | 4.92                | 1.12    | 36 |

| Multiple t-tests 4T1 vs 4T07 CAF+ out of Live cells |            |          |              |               |            |                     |         |    |
|-----------------------------------------------------|------------|----------|--------------|---------------|------------|---------------------|---------|----|
| Day                                                 | Discovery? | P value  | Mean1<br>4T1 | Mean2<br>4T07 | Difference | SE of<br>difference | t ratio | df |
| D7                                                  |            | 0.116181 | 3.39         | 4.67          | -1.28      | 0.80                | 1.60    | 43 |
| D14                                                 | *          | 0.001006 | 2.45         | 5.49          | -3.04      | 0.86                | 3.53    | 43 |
| D21                                                 |            | 0.266583 | 3.76         | 4.88          | -1.11      | 0.99                | 1.13    | 36 |

table S5

| Multiple t-tests 4T1 vs 4T07 D7 |            |            |              |               |            |                     |         |    |
|---------------------------------|------------|------------|--------------|---------------|------------|---------------------|---------|----|
| CAF marker                      | Discovery? | P value    | Mean1<br>4T1 | Mean2<br>4T07 | Difference | SE of<br>difference | t ratio | df |
| PDGFRa                          |            | 0.0363678  | 48.99        | 38.28         | 10.71      | 4.96                | 2.16    | 43 |
| PDGFRb                          |            | 0.278426   | 53.38        | 48.40         | 4.98       | 4.54                | 1.10    | 43 |
| Podoplanin                      |            | 0.0041234  | 55.27        | 40.49         | 14.78      | 4.88                | 3.03    | 43 |
| FAP                             |            | 0.0482698  | 46.58        | 51.95         | -5.37      | 2.64                | 2.03    | 43 |
| aSMA                            | *          | 0.00114589 | 29.03        | 19.40         | 9.63       | 2.76                | 3.48    | 43 |
| CD26                            |            | 0.0419432  | 55.93        | 66.52         | -10.58     | 5.05                | 2.10    | 43 |

| Multiple t-tests 4T1 vs 4T07 D14 |            |            |              |               |            |                     |         |    |
|----------------------------------|------------|------------|--------------|---------------|------------|---------------------|---------|----|
| CAF marker                       | Discovery? | P value    | Mean1<br>4T1 | Mean2<br>4T07 | Difference | SE of<br>difference | t ratio | df |
| PDGFRa                           |            | 0.147984   | 26.03        | 19.27         | 6.76       | 4.59                | 1.47    | 43 |
| PDGFRb                           |            | 0.0167179  | 31.32        | 43.83         | -12.51     | 5.02                | 2.49    | 43 |
| Podoplanin                       |            | 0.0160842  | 26.11        | 38.00         | -11.89     | 4.75                | 2.51    | 43 |
| FAP                              |            | 0.0290361  | 62.45        | 55.01         | 7.45       | 3.30                | 2.26    | 43 |
| aSMA                             | *          | 0.00013461 | 9.03         | 19.92         | -10.89     | 2.60                | 4.19    | 43 |
| CD26                             |            | 0.571223   | 62.08        | 64.26         | -2.18      | 3.82                | 0.57    | 43 |

| Multiple t-tests 4T1 vs 4T07 D21 |            |            |              |               |            |                     |         |    |
|----------------------------------|------------|------------|--------------|---------------|------------|---------------------|---------|----|
| CAF marker                       | Discovery? | P value    | Mean1<br>4T1 | Mean2<br>4T07 | Difference | SE of<br>difference | t ratio | df |
| PDGFRa                           | *          | 0.00138182 | 18.15        | 33.19         | -15.04     | 4.34                | 3.47    | 36 |
| PDGFRb                           |            | 0.132781   | 42.88        | 32.99         | 9.89       | 6.43                | 1.54    | 36 |
| Podoplanin                       |            | 0.0135633  | 31.49        | 20.11         | 11.38      | 4.38                | 2.60    | 36 |
| FAP                              |            | 0.0904156  | 61.98        | 56.44         | 5.54       | 3.19                | 1.74    | 36 |
| aSMA                             | *          | 0.00213947 | 17.93        | 7.59          | 10.34      | 3.12                | 3.31    | 36 |
| CD26                             | *          | 8.4759E-06 | 65.17        | 47.91         | 17.26      | 3.33                | 5.19    | 36 |

# table S6

|                                   |            |                  |              |             |                  |    |        |     |  |
|-----------------------------------|------------|------------------|--------------|-------------|------------------|----|--------|-----|--|
| Number of families                | 6          |                  |              |             |                  |    |        |     |  |
| Number of comparisons per family  | 3          |                  |              |             | Combined         |    |        |     |  |
| Alpha                             | 0.05       |                  |              |             | Repeat 1, 2, 3   |    |        |     |  |
| Tukey's multiple comparisons test | Mean Diff. | 95% CI of diff.  | Significant? | Summary     | Adjusted P Value |    |        |     |  |
| PDGFRa                            |            |                  |              |             |                  |    |        |     |  |
| 4T1day 7 vs. 4T1day 14            | 29.72      | 20.23 to 39.22   | Yes          | ****        | <0.0001          |    |        |     |  |
| 4T1day 7 vs. 4T1day 21            | 30.85      | 21.35 to 40.34   | Yes          | ****        | <0.0001          |    |        |     |  |
| 4T1day 14 vs. 4T1day 21           | 1.24       | -8.047 to 10.29  | No           | ns          | 0.9552           |    |        |     |  |
| PDGFRb                            |            |                  |              |             |                  |    |        |     |  |
| 4T1day 7 vs. 4T1day 14            | 9.553      | 0.05991 to 19.05 | Yes          | *           | 0.0482           |    |        |     |  |
| 4T1day 7 vs. 4T1day 21            | 10.5       | 1.011 to 20.00   | Yes          | *           | 0.0259           |    |        |     |  |
| 4T1day 14 vs. 4T1day 21           | 0.9512     | -8.219 to 10.12  | No           | ns          | 0.9677           |    |        |     |  |
| Podoplanin                        |            |                  |              |             |                  |    |        |     |  |
| 4T1day 7 vs. 4T1day 14            | 17.27      | 7.772 to 26.76   | Yes          | ****        | <0.0001          |    |        |     |  |
| 4T1day 7 vs. 4T1day 21            | 23.78      | 14.29 to 33.27   | Yes          | ****        | <0.0001          |    |        |     |  |
| 4T1day 14 vs. 4T1day 21           | 6.515      | -2.656 to 5.69   | No           | ns          | 0.2175           |    |        |     |  |
| FAP                               |            |                  |              |             |                  |    |        |     |  |
| 4T1day 7 vs. 4T1day 14            | -8.426     | -17.92 to 10.67  | No           | ns          | 0.0936           |    |        |     |  |
| 4T1day 7 vs. 4T1day 21            | -15.4      | -24.89 to -5.905 | Yes          | ***         | 0.0005           |    |        |     |  |
| 4T1day 14 vs. 4T1day 21           | -6.972     | -15.14 to 2.199  | No           | ns          | 0.1748           |    |        |     |  |
| aSMA                              |            |                  |              |             |                  |    |        |     |  |
| 4T1day 7 vs. 4T1day 14            | 9.107      | -0.3859 to 19.60 | No           | ns          | 0.0632           |    |        |     |  |
| 4T1day 7 vs. 4T1day 21            | 11.1       | 1.603 to 20.59   | Yes          | *           | 0.0171           |    |        |     |  |
| 4T1day 14 vs. 4T1day 21           | 1.989      | -7.182 to 11.15  | No           | ns          | 0.8664           |    |        |     |  |
| CD26                              |            |                  |              |             |                  |    |        |     |  |
| 4T1day 7 vs. 4T1day 14            | -8.326     | -17.82 to 1.166  | No           | ns          | 0.0989           |    |        |     |  |
| 4T1day 7 vs. 4T1day 21            | -9.239     | -18.73 to 0.2539 | No           | ns          | 0.0584           |    |        |     |  |
| 4T1day 14 vs. 4T1day 21           | -0.9125    | -10.08 to 8.258  | No           | ns          | 0.9702           |    |        |     |  |
| Test details                      |            |                  |              |             |                  |    |        |     |  |
|                                   | Mean 1     | Mean 2           | Mean Diff.   | SE of diff. | N1               | N2 | q      | DF  |  |
| PDGFRa                            |            |                  |              |             |                  |    |        |     |  |
| 4T1day 7 vs. 4T1day 14            | 48.99      | 19.27            | 29.72        | 4.035       | 21               | 24 | 10.42  | 396 |  |
| 4T1day 7 vs. 4T1day 21            | 48.99      | 18.15            | 30.85        | 4.035       | 21               | 24 | 10.81  | 396 |  |
| 4T1day 14 vs. 4T1day 21           | 19.27      | 18.15            | 1.24         | 3.898       | 24               | 24 | 0.4077 | 396 |  |
| PDGFRb                            |            |                  |              |             |                  |    |        |     |  |
| 4T1day 7 vs. 4T1day 14            | 53.38      | 43.83            | 9.553        | 4.035       | 21               | 24 | 3.348  | 396 |  |
| 4T1day 7 vs. 4T1day 21            | 53.38      | 42.88            | 10.5         | 4.035       | 21               | 24 | 3.681  | 396 |  |
| 4T1day 14 vs. 4T1day 21           | 43.83      | 42.88            | 0.9512       | 3.898       | 24               | 24 | 0.3451 | 396 |  |
| Podoplanin                        |            |                  |              |             |                  |    |        |     |  |
| 4T1day 7 vs. 4T1day 14            | 55.27      | 38               | 17.27        | 4.035       | 21               | 24 | 6.051  | 396 |  |
| 4T1day 7 vs. 4T1day 21            | 55.27      | 31.49            | 23.78        | 4.035       | 21               | 24 | 8.335  | 396 |  |
| 4T1day 14 vs. 4T1day 21           | 38         | 31.49            | 6.515        | 3.898       | 24               | 24 | 2.364  | 396 |  |
| FAP                               |            |                  |              |             |                  |    |        |     |  |
| 4T1day 7 vs. 4T1day 14            | 46.58      | 55.01            | -8.426       | 4.035       | 21               | 24 | 2.953  | 396 |  |
| 4T1day 7 vs. 4T1day 21            | 46.58      | 61.98            | -15.4        | 4.035       | 21               | 24 | 5.397  | 396 |  |
| 4T1day 14 vs. 4T1day 21           | 55.01      | 61.98            | -6.972       | 3.898       | 24               | 24 | 2.529  | 396 |  |
| aSMA                              |            |                  |              |             |                  |    |        |     |  |
| 4T1day 7 vs. 4T1day 14            | 29.03      | 19.92            | 9.107        | 4.035       | 21               | 24 | 3.192  | 396 |  |
| 4T1day 7 vs. 4T1day 21            | 29.03      | 17.93            | 11.1         | 4.035       | 21               | 24 | 3.889  | 396 |  |
| 4T1day 14 vs. 4T1day 21           | 19.92      | 17.93            | 1.989        | 3.898       | 24               | 24 | 0.7215 | 396 |  |
| CD26                              |            |                  |              |             |                  |    |        |     |  |
| 4T1day 7 vs. 4T1day 14            | 55.93      | 64.26            | -8.326       | 4.035       | 21               | 24 | 2.918  | 396 |  |
| 4T1day 7 vs. 4T1day 21            | 55.93      | 65.17            | -9.239       | 4.035       | 21               | 24 | 3.238  | 396 |  |
| 4T1day 14 vs. 4T1day 21           | 64.26      | 65.17            | -0.9125      | 3.898       | 24               | 24 | 0.331  | 396 |  |

|                                   |            |                   |              |             |                  |    |        |     |  |
|-----------------------------------|------------|-------------------|--------------|-------------|------------------|----|--------|-----|--|
| Number of families                | 6          |                   |              |             |                  |    |        |     |  |
| Number of comparisons per family  | 3          |                   |              |             | Combined         |    |        |     |  |
| Alpha                             | 0.05       |                   |              |             | Repeat 1, 2, 3   |    |        |     |  |
| Tukey's multiple comparisons test | Mean Diff. | 95% CI of diff.   | Significant? | Summary     | Adjusted P Value |    |        |     |  |
| PDGFRa                            |            |                   |              |             |                  |    |        |     |  |
| 4T07 day 7 vs. 4T07 day 14        | 12.25      | 2.537 to 21.97    | Yes          | **          | 0.009            |    |        |     |  |
| 4T07 day 7 vs. 4T07 day 21        | 5.095      | -5.840 to 16.03   | No           | ns          | 0.5167           |    |        |     |  |
| 4T07 day 14 vs. 4T07 day 21       | -7.158     | -18.38 to 4.061   | No           | ns          | 0.2912           |    |        |     |  |
| PDGFRb                            |            |                   |              |             |                  |    |        |     |  |
| 4T07 day 7 vs. 4T07 day 14        | 17.08      | 7.361 to 26.79    | Yes          | ***         | 0.0001           |    |        |     |  |
| 4T07 day 7 vs. 4T07 day 21        | 15.41      | 4.473 to 26.34    | Yes          | **          | 0.0029           |    |        |     |  |
| 4T07 day 14 vs. 4T07 day 21       | -1.668     | -12.89 to 9.550   | No           | ns          | 0.9346           |    |        |     |  |
| Podoplanin                        |            |                   |              |             |                  |    |        |     |  |
| 4T07 day 7 vs. 4T07 day 14        | 14.38      | 4.664 to 24.10    | Yes          | **          | 0.0016           |    |        |     |  |
| 4T07 day 7 vs. 4T07 day 21        | 20.38      | 9.446 to 31.32    | Yes          | ****        | <0.0001          |    |        |     |  |
| 4T07 day 14 vs. 4T07 day 21       | 6.001      | -5.218 to 17.22   | No           | ns          | 0.4194           |    |        |     |  |
| FAP                               |            |                   |              |             |                  |    |        |     |  |
| 4T07 day 7 vs. 4T07 day 14        | -10.5      | -20.22 to -0.7858 | Yes          | *           | 0.0305           |    |        |     |  |
| 4T07 day 7 vs. 4T07 day 21        | -4.484     | -15.42 to 6.452   | No           | ns          | 0.5994           |    |        |     |  |
| 4T07 day 14 vs. 4T07 day 21       | 6.018      | -5.201 to 17.24   | No           | ns          | 0.4173           |    |        |     |  |
| aSMA                              |            |                   |              |             |                  |    |        |     |  |
| 4T07 day 7 vs. 4T07 day 14        | 10.36      | 0.6476 to 20.08   | Yes          | *           | 0.0334           |    |        |     |  |
| 4T07 day 7 vs. 4T07 day 21        | 11.8       | 0.8686 to 22.74   | Yes          | *           | 0.0308           |    |        |     |  |
| 4T07 day 14 vs. 4T07 day 21       | 1.44       | -9.779 to 12.66   | No           | ns          | 0.9509           |    |        |     |  |
| CD26                              |            |                   |              |             |                  |    |        |     |  |
| 4T07 day 7 vs. 4T07 day 14        | 4.437      | -5.279 to 14.15   | No           | ns          | 0.5302           |    |        |     |  |
| 4T07 day 7 vs. 4T07 day 21        | 13.6       | 7.668 to 29.54    | Yes          | ***         | 0.0002           |    |        |     |  |
| 4T07 day 14 vs. 4T07 day 21       | 14.17      | 2.946 to 25.38    | Yes          | **          | 0.0089           |    |        |     |  |
| Test details                      |            |                   |              |             |                  |    |        |     |  |
|                                   | Mean 1     | Mean 2            | Mean Diff.   | SE of diff. | N1               | N2 | q      | DF  |  |
| PDGFRa                            |            |                   |              |             |                  |    |        |     |  |
| 4T07 day 7 vs. 4T07 day 14        | 38.28      | 26.03             | 12.25        | 4.127       | 24               | 21 | 4.199  | 336 |  |
| 4T07 day 7 vs. 4T07 day 21        | 38.28      | 33.19             | 5.095        | 4.645       | 24               | 14 | 1.551  | 336 |  |
| 4T07 day 14 vs. 4T07 day 21       | 26.03      | 33.19             | -7.158       | 4.766       | 21               | 14 | 2.24   | 336 |  |
| PDGFRb                            |            |                   |              |             |                  |    |        |     |  |
| 4T07 day 7 vs. 4T07 day 14        | 48.4       | 31.32             | 17.08        | 4.127       | 24               | 21 | 5.852  | 336 |  |
| 4T07 day 7 vs. 4T07 day 21        | 48.4       | 32.99             | 15.41        | 4.645       | 24               | 14 | 4.691  | 336 |  |
| 4T07 day 14 vs. 4T07 day 21       | 31.32      | 32.99             | -1.668       | 4.766       | 21               | 14 | 0.4953 | 336 |  |
| Podoplanin                        |            |                   |              |             |                  |    |        |     |  |
| 4T07 day 7 vs. 4T07 day 14        | 40.49      | 26.11             | 14.38        | 4.127       | 24               | 21 | 4.928  | 336 |  |
| 4T07 day 7 vs. 4T07 day 21        | 40.49      | 20.11             | 20.38        | 4.645       | 24               | 14 | 6.205  | 336 |  |
| 4T07 day 14 vs. 4T07 day 21       | 26.11      | 20.11             | 6.001        | 4.766       | 21               | 14 | 1.781  | 336 |  |
| FAP                               |            |                   |              |             |                  |    |        |     |  |
| 4T07 day 7 vs. 4T07 day 14        | 51.95      | 62.45             | -10.5        | 4.127       | 24               | 21 | 3.599  | 336 |  |
| 4T07 day 7 vs. 4T07 day 21        | 51.95      | 56.44             | -4.484       | 4.645       | 24               | 14 | 1.365  | 336 |  |
| 4T07 day 14 vs. 4T07 day 21       | 62.45      | 56.44             | 6.018        | 4.766       | 21               | 14 | 1.786  | 336 |  |
| aSMA                              |            |                   |              |             |                  |    |        |     |  |
| 4T07 day 7 vs. 4T07 day 14        | 19.4       | 9.034             | 10.36        | 4.127       | 24               | 21 | 3.551  | 336 |  |
| 4T07 day 7 vs. 4T07 day 21        | 19.4       | 7.594             | 11.8         | 4.645       | 24               | 14 | 3.594  | 336 |  |
| 4T07 day 14 vs. 4T07 day 21       | 9.034      | 7.594             | 1.44         | 4.766       | 21               | 14 | 0.4273 | 336 |  |
| CD26                              |            |                   |              |             |                  |    |        |     |  |
| 4T07 day 7 vs. 4T07 day 14        | 66.52      | 62.08             | 4.437        | 4.127       | 24               | 21 | 1.521  | 336 |  |
| 4T07 day 7 vs. 4T07 day 21        | 66.52      | 47.91             | 18.6         | 4.645       | 24               | 14 | 5.664  | 336 |  |
| 4T07 day 14 vs. 4T07 day 21       | 62.08      | 47.91             | 14.17        | 4.766       | 21               | 14 | 4.204  | 336 |  |

table S7

## 4T1

| Day 7               |            | ① First CAF marker |          |           |        |          |           |            |          |           |        |          |           |        |          |           |        |          |           |
|---------------------|------------|--------------------|----------|-----------|--------|----------|-----------|------------|----------|-----------|--------|----------|-----------|--------|----------|-----------|--------|----------|-----------|
|                     |            | PDGFRa             |          |           | PDGFRb |          |           | Podoplanin |          |           | FAPa   |          |           | aSMA   |          |           | CD26   |          |           |
|                     |            | Mean               | CI95_low | CI95_high | Mean   | CI95_low | CI95_high | Mean       | CI95_low | CI95_high | Mean   | CI95_low | CI95_high | Mean   | CI95_low | CI95_high | Mean   | CI95_low | CI95_high |
| ② Subset CAF marker | PDGFRa     | 100.00             | 100.00   | 100.00    | 50.67  | 43.01    | 58.33     | 65.14      | 59.10    | 71.18     | 38.09  | 29.13    | 47.05     | 49.81  | 42.43    | 57.19     | 45.86  | 36.29    | 55.43     |
|                     | PDGFRb     | 58.00              | 50.04    | 65.96     | 100.00 | 100.00   | 100.00    | 68.52      | 61.14    | 75.90     | 62.02  | 57.46    | 66.57     | 71.93  | 64.62    | 79.24     | 60.66  | 53.67    | 67.65     |
|                     | Podoplanin | 77.70              | 68.49    | 86.91     | 68.42  | 63.67    | 73.16     | 100.00     | 100.00   | 100.00    | 41.52  | 32.15    | 50.88     | 88.92  | 84.20    | 93.64     | 64.04  | 55.37    | 72.70     |
|                     | FAPa       | 34.55              | 29.23    | 39.87     | 55.69  | 49.30    | 62.07     | 34.26      | 28.46    | 40.05     | 100.00 | 100.00   | 100.00    | 26.32  | 19.64    | 32.99     | 49.32  | 46.41    | 52.23     |
|                     | aSMA       | 31.62              | 25.84    | 37.40     | 37.84  | 33.57    | 42.11     | 47.37      | 41.18    | 53.56     | 16.07  | 11.27    | 20.86     | 100.00 | 100.00   | 100.00    | 33.11  | 26.95    | 39.27     |
|                     | CD26       | 52.88              | 42.70    | 63.05     | 62.00  | 55.79    | 68.22     | 63.40      | 55.97    | 70.82     | 59.04  | 51.98    | 66.10     | 60.70  | 53.69    | 67.70     | 100.00 | 100.00   | 100.00    |

| Day 14              |            | ① First CAF marker |          |           |        |          |           |            |          |           |        |          |           |        |          |           |        |          |           |
|---------------------|------------|--------------------|----------|-----------|--------|----------|-----------|------------|----------|-----------|--------|----------|-----------|--------|----------|-----------|--------|----------|-----------|
|                     |            | PDGFRa             |          |           | PDGFRb |          |           | Podoplanin |          |           | FAPa   |          |           | aSMA   |          |           | CD26   |          |           |
|                     |            | Mean               | CI95_low | CI95_high | Mean   | CI95_low | CI95_high | Mean       | CI95_low | CI95_high | Mean   | CI95_low | CI95_high | Mean   | CI95_low | CI95_high | Mean   | CI95_low | CI95_high |
| ② Subset CAF marker | PDGFRa     | 100.00             | 100.00   | 100.00    | 26.67  | 19.45    | 33.89     | 40.34      | 33.42    | 47.26     | 15.06  | 10.63    | 19.50     | 25.95  | 20.65    | 31.24     | 22.00  | 14.83    | 29.18     |
|                     | PDGFRb     | 62.74              | 56.76    | 68.71     | 100.00 | 100.00   | 100.00    | 66.43      | 60.65    | 72.20     | 52.21  | 45.06    | 59.35     | 70.22  | 65.81    | 74.62     | 46.62  | 38.56    | 54.67     |
|                     | Podoplanin | 84.31              | 79.56    | 89.06     | 55.06  | 47.71    | 62.41     | 100.00     | 100.00   | 100.00    | 27.29  | 21.02    | 33.56     | 88.67  | 86.59    | 90.74     | 43.91  | 34.39    | 53.44     |
|                     | FAPa       | 46.95              | 39.76    | 54.14     | 67.37  | 62.77    | 71.98     | 43.09      | 35.59    | 50.60     | 100.00 | 100.00   | 100.00    | 31.62  | 24.98    | 38.26     | 49.72  | 45.16    | 54.28     |
|                     | aSMA       | 27.58              | 23.21    | 31.95     | 29.62  | 25.50    | 33.74     | 46.06      | 39.87    | 52.25     | 10.12  | 7.19     | 13.04     | 100.00 | 100.00   | 100.00    | 19.87  | 15.27    | 24.47     |
|                     | CD26       | 71.69              | 66.72    | 76.65     | 67.91  | 63.38    | 72.44     | 71.83      | 66.91    | 76.76     | 57.34  | 54.43    | 60.25     | 62.95  | 58.42    | 67.49     | 100.00 | 100.00   | 100.00    |

| Day 21              |            | ① First CAF marker |          |           |        |          |           |            |          |           |        |          |           |        |          |           |        |          |           |
|---------------------|------------|--------------------|----------|-----------|--------|----------|-----------|------------|----------|-----------|--------|----------|-----------|--------|----------|-----------|--------|----------|-----------|
|                     |            | PDGFRa             |          |           | PDGFRb |          |           | Podoplanin |          |           | FAPa   |          |           | aSMA   |          |           | CD26   |          |           |
|                     |            | Mean               | CI95_low | CI95_high | Mean   | CI95_low | CI95_high | Mean       | CI95_low | CI95_high | Mean   | CI95_low | CI95_high | Mean   | CI95_low | CI95_high | Mean   | CI95_low | CI95_high |
| ② Subset CAF marker | PDGFRa     | 100.00             | 100.00   | 100.00    | 26.74  | 20.16    | 33.31     | 42.85      | 38.55    | 47.15     | 13.88  | 10.64    | 17.13     | 26.07  | 22.21    | 29.94     | 20.66  | 15.69    | 25.63     |
|                     | PDGFRb     | 56.32              | 48.39    | 64.25     | 100.00 | 100.00   | 100.00    | 66.96      | 60.11    | 73.80     | 47.74  | 39.82    | 55.67     | 71.59  | 64.28    | 78.91     | 46.83  | 38.40    | 55.26     |
|                     | Podoplanin | 74.90              | 65.76    | 84.03     | 51.43  | 42.87    | 59.99     | 100.00     | 100.00   | 100.00    | 23.23  | 17.89    | 28.58     | 87.63  | 84.68    | 90.58     | 36.34  | 29.21    | 43.47     |
|                     | FAPa       | 47.46              | 41.19    | 53.73     | 70.59  | 65.03    | 76.14     | 47.77      | 39.65    | 55.89     | 100.00 | 100.00   | 100.00    | 36.46  | 29.18    | 43.74     | 57.52  | 54.11    | 60.92     |
|                     | aSMA       | 25.58              | 19.26    | 31.90     | 29.82  | 22.81    | 36.84     | 45.66      | 40.75    | 50.58     | 10.53  | 6.54     | 14.52     | 100.00 | 100.00   | 100.00    | 18.16  | 13.45    | 22.87     |
|                     | CD26       | 70.56              | 63.85    | 77.28     | 71.27  | 67.12    | 75.43     | 73.88      | 71.09    | 76.66     | 60.35  | 57.60    | 63.11     | 66.14  | 62.42    | 69.86     | 100.00 | 100.00   | 100.00    |

## 4T07

| Day 7               |            | ① First CAF marker |          |           |        |          |           |            |          |           |        |          |           |        |          |           |        |          |           |
|---------------------|------------|--------------------|----------|-----------|--------|----------|-----------|------------|----------|-----------|--------|----------|-----------|--------|----------|-----------|--------|----------|-----------|
|                     |            | PDGFRa             |          |           | PDGFRb |          |           | Podoplanin |          |           | FAPa   |          |           | aSMA   |          |           | CD26   |          |           |
|                     |            | Mean               | CI95_low | CI95_high | Mean   | CI95_low | CI95_high | Mean       | CI95_low | CI95_high | Mean   | CI95_low | CI95_high | Mean   | CI95_low | CI95_high | Mean   | CI95_low | CI95_high |
| ② Subset CAF marker | PDGFRa     | 100.00             | 100.00   | 100.00    | 46.06  | 39.96    | 52.15     | 65.84      | 61.33    | 70.35     | 29.68  | 24.32    | 35.04     | 51.11  | 45.54    | 56.68     | 35.77  | 29.76    | 41.77     |
|                     | PDGFRb     | 60.93              | 53.01    | 68.86     | 100.00 | 100.00   | 100.00    | 73.94      | 69.47    | 78.40     | 57.16  | 52.16    | 62.15     | 80.34  | 76.63    | 84.05     | 54.01  | 47.07    | 60.95     |
|                     | Podoplanin | 75.81              | 65.84    | 85.79     | 60.42  | 55.34    | 65.51     | 100.00     | 100.00   | 100.00    | 34.01  | 29.30    | 38.71     | 88.01  | 83.96    | 92.06     | 48.71  | 41.78    | 55.65     |
|                     | FAPa       | 41.09              | 36.47    | 45.72     | 63.80  | 58.82    | 68.78     | 46.81      | 40.94    | 52.68     | 100.00 | 100.00   | 100.00    | 38.05  | 31.57    | 44.54     | 51.10  | 48.16    | 54.05     |
|                     | aSMA       | 29.10              | 23.46    | 34.75     | 31.99  | 27.61    | 36.38     | 42.25      | 37.88    | 46.62     | 13.47  | 10.43    | 16.51     | 100.00 | 100.00   | 100.00    | 22.20  | 18.48    | 25.93     |
|                     | CD26       | 66.62              | 55.90    | 77.33     | 72.07  | 67.52    | 76.61     | 78.21      | 73.32    | 83.11     | 63.88  | 58.34    | 69.42     | 74.91  | 69.13    | 80.70     | 100.00 | 100.00   | 100.00    |

| Day 14              |            | ① First CAF marker |          |           |        |          |           |            |          |           |        |          |           |        |          |           |        |          |           |
|---------------------|------------|--------------------|----------|-----------|--------|----------|-----------|------------|----------|-----------|--------|----------|-----------|--------|----------|-----------|--------|----------|-----------|
|                     |            | PDGFRa             |          |           | PDGFRb |          |           | Podoplanin |          |           | FAPa   |          |           | aSMA   |          |           | CD26   |          |           |
|                     |            | Mean               | CI95_low | CI95_high | Mean   | CI95_low | CI95_high | Mean       | CI95_low | CI95_high | Mean   | CI95_low | CI95_high | Mean   | CI95_low | CI95_high | Mean   | CI95_low | CI95_high |
| ② Subset CAF marker | PDGFRa     | 100.00             | 100.00   | 100.00    | 35.67  | 28.90    | 42.44     | 58.62      | 52.58    | 64.65     | 19.44  | 13.47    | 25.41     | 50.10  | 44.13    | 56.07     | 23.38  | 17.04    | 29.71     |
|                     | PDGFRb     | 43.33              | 36.41    | 50.25     | 100.00 | 100.00   | 100.00    | 54.13      | 47.46    | 60.79     | 38.53  | 31.06    | 46.00     | 66.19  | 61.04    | 71.34     | 36.84  | 28.09    | 45.58     |
|                     | Podoplanin | 66.72              | 56.53    | 76.90     | 46.78  | 39.87    | 53.69     | 100.00     | 100.00   | 100.00    | 22.76  | 17.44    | 28.08     | 88.07  | 83.57    | 92.58     | 31.27  | 24.02    | 38.52     |
|                     | FAPa       | 45.55              | 39.42    | 51.68     | 78.53  | 74.81    | 82.25     | 54.76      | 49.91    | 59.61     | 100.00 | 100.00   | 100.00    | 50.95  | 44.35    | 57.54     | 57.50  | 51.22    | 63.78     |
|                     | aSMA       | 19.89              | 15.78    | 24.00     | 19.99  | 16.28    | 23.69     | 30.66      | 25.92    | 35.40     | 7.11   | 5.24     | 8.98      | 100.00 | 100.00   | 100.00    | 9.73   | 7.29     | 12.18     |
|                     | CD26       | 62.39              | 50.86    | 73.91     | 71.55  | 66.32    | 76.78     | 73.89      | 66.94    | 80.83     | 55.90  | 50.75    | 61.05     | 66.29  | 59.84    | 72.74     | 100.00 | 100.00   | 100.00    |

| Day 21              |            | ① First CAF marker |          |           |        |          |           |            |          |           |        |          |           |        |          |           |        |          |           |
|---------------------|------------|--------------------|----------|-----------|--------|----------|-----------|------------|----------|-----------|--------|----------|-----------|--------|----------|-----------|--------|----------|-----------|
|                     |            | PDGFRa             |          |           | PDGFRb |          |           | Podoplanin |          |           | FAPa   |          |           | aSMA   |          |           | CD26   |          |           |
|                     |            | Mean               | CI95_low | CI95_high | Mean   | CI95_low | CI95_high | Mean       | CI95_low | CI95_high | Mean   | CI95_low | CI95_high | Mean   | CI95_low | CI95_high | Mean   | CI95_low | CI95_high |
| ② Subset CAF marker | PDGFRa     | 100.00             | 100.00   | 100.00    | 34.42  | 24.70    | 44.14     | 59.55      | 51.54    | 67.57     | 20.27  | 13.43    | 27.10     | 47.31  | 41.62    | 53.00     | 25.21  | 16.60    | 33.82     |
|                     | PDGFRb     | 38.98              | 25.05    | 52.91     | 100.00 | 100.00   | 100.00    | 58.09      | 47.43    | 68.74     | 40.88  | 30.98    | 50.77     | 65.45  | 52.47    | 78.43     | 37.64  | 26.88    | 48.40     |
|                     | Podoplanin | 45.10              | 29.38    | 60.82     | 38.22  | 28.35    | 48.09     | 100.00     | 100.00   | 100.00    | 15.72  | 11.82    | 19.63     | 82.57  | 71.31    | 93.84     | 24.73  | 17.50    | 31.96     |
|                     | FAPa       | 34.45              | 28.43    | 40.47     | 75.58  | 68.22    | 82.94     | 48.50      | 40.28    | 56.71     | 100.00 | 100.00   | 100.00    | 35.98  | 27.41    | 44.55     | 56.77  | 50.52    | 63.02     |
|                     | aSMA       | 14.22              | 7.99     | 20.45     | 15.49  | 10.16    | 20.82     | 29.70      | 21.98    | 37.42     | 4.16   | 2.67     | 5.65      | 100.00 | 100.00   | 100.00    | 6.84   | 4.53     | 9.15      |
|                     | CD26       | 42.43              | 29.01    | 55.85     | 56.74  | 49.29    | 64.18     | 59.70      | 51.50    | 67.90     | 47.12  | 43.03    | 51.21     | 46.53  | 37.30    | 55.76     | 100.00 | 100.00   | 100.00    |

table S8

| Top | 4T1 D7     |        |      |    | 4T1 D14    |        |      |    | 4T1 D21    |        |      |    |
|-----|------------|--------|------|----|------------|--------|------|----|------------|--------|------|----|
|     | CAF subset | Mean % | SEM  | n  | CAF subset | Mean % | SEM  | n  | CAF subset | Mean % | SEM  | n  |
| 1   | S56        | 8.07   | 1.17 | 21 | S32        | 16.45  | 3.13 | 24 | S32        | 15.09  | 1.96 | 24 |
| 2   | S63        | 7.07   | 2.14 | 21 | S56        | 13.98  | 1.34 | 24 | S56        | 14.55  | 0.76 | 24 |
| 3   | S22        | 6.87   | 0.85 | 21 | S22        | 10.38  | 1.31 | 24 | S22        | 13.21  | 2.03 | 24 |
| 4   | S32        | 5.84   | 1.33 | 21 | S24        | 8.11   | 0.96 | 24 | S24        | 11.35  | 1.23 | 24 |
| 5   | S17        | 5.82   | 0.88 | 21 | S54        | 6.41   | 0.95 | 24 | S54        | 6.19   | 1.25 | 24 |
| 6   | S27        | 4.83   | 1.20 | 21 | S10        | 3.84   | 0.60 | 24 | S10        | 2.97   | 0.52 | 24 |
| 7   | S54        | 4.45   | 0.48 | 21 | S27        | 3.78   | 1.06 | 24 | S17        | 2.72   | 0.32 | 24 |
| 8   | S9         | 4.20   | 0.63 | 21 | S17        | 3.39   | 0.51 | 24 | S18        | 2.09   | 0.28 | 24 |
| 9   | S10        | 3.78   | 0.59 | 21 | S42        | 2.72   | 0.57 | 24 | S25        | 2.02   | 0.38 | 24 |
| 10  | S41        | 3.56   | 0.71 | 21 | S18        | 2.49   | 0.18 | 24 | S2         | 1.97   | 0.21 | 24 |
| 11  | S1         | 3.55   | 0.75 | 21 | S12        | 2.07   | 0.32 | 24 | S27        | 1.92   | 0.43 | 24 |
| 12  | S24        | 3.24   | 0.61 | 21 | S2         | 1.94   | 0.24 | 24 | S42        | 1.79   | 0.33 | 24 |
| 13  | S57        | 3.23   | 0.44 | 21 | S25        | 1.92   | 0.34 | 24 | S1         | 1.66   | 0.35 | 24 |
| 14  | S25        | 2.59   | 0.31 | 21 | S1         | 1.66   | 0.29 | 24 | S9         | 1.50   | 0.24 | 24 |
| 15  | S42        | 2.44   | 0.44 | 21 | S62        | 1.66   | 0.25 | 24 | S62        | 1.47   | 0.14 | 24 |
| 16  | S59        | 2.15   | 0.31 | 21 | S44        | 1.47   | 0.36 | 24 | S63        | 1.45   | 0.34 | 24 |
| 17  | S62        | 2.06   | 0.30 | 21 | S28        | 1.46   | 0.31 | 24 | S12        | 1.35   | 0.23 | 24 |
| 18  | S19        | 2.02   | 0.53 | 21 | S63        | 1.40   | 0.65 | 24 | S20        | 1.17   | 0.17 | 24 |
| 19  | S12        | 1.95   | 0.37 | 21 | S9         | 1.36   | 0.17 | 24 | S44        | 1.13   | 0.25 | 24 |
| 20  | S11        | 1.92   | 0.45 | 21 | S19        | 1.14   | 0.28 | 24 | S19        | 1.10   | 0.21 | 24 |
| 21  | S18        | 1.74   | 0.17 | 21 | S20        | 1.05   | 0.17 | 24 | S48        | 1.06   | 0.27 | 24 |
| 22  | S2         | 1.40   | 0.18 | 21 | S48        | 0.90   | 0.14 | 24 | S55        | 0.82   | 0.23 | 24 |
| 23  | S49        | 1.28   | 0.12 | 21 | S26        | 0.85   | 0.12 | 24 | S60        | 0.69   | 0.10 | 24 |
| 24  | S55        | 1.27   | 0.44 | 21 | S41        | 0.74   | 0.15 | 24 | S28        | 0.64   | 0.08 | 24 |
| 25  | S48        | 1.16   | 0.22 | 21 | S50        | 0.70   | 0.06 | 24 | S26        | 0.64   | 0.11 | 24 |
| 26  | S21        | 1.04   | 0.18 | 21 | S58        | 0.67   | 0.11 | 24 | S11        | 0.59   | 0.12 | 24 |
| 27  | S28        | 1.00   | 0.21 | 21 | S57        | 0.65   | 0.11 | 24 | S23        | 0.57   | 0.08 | 24 |
| 28  | S58        | 0.95   | 0.17 | 21 | S60        | 0.62   | 0.05 | 24 | S52        | 0.55   | 0.08 | 24 |
| 29  | S44        | 0.81   | 0.09 | 21 | S11        | 0.58   | 0.16 | 24 | S41        | 0.53   | 0.08 | 24 |
| 30  | S26        | 0.71   | 0.09 | 21 | S52        | 0.53   | 0.08 | 24 | S50        | 0.53   | 0.05 | 24 |
| 31  | S20        | 0.70   | 0.12 | 21 | S34        | 0.48   | 0.05 | 24 | S57        | 0.52   | 0.08 | 24 |
| 32  | S43        | 0.67   | 0.08 | 21 | S46        | 0.45   | 0.07 | 24 | S58        | 0.50   | 0.09 | 24 |
| 33  | S50        | 0.61   | 0.09 | 21 | S59        | 0.44   | 0.07 | 24 | S4         | 0.46   | 0.14 | 24 |
| 34  | S3         | 0.59   | 0.20 | 21 | S55        | 0.44   | 0.12 | 24 | S59        | 0.46   | 0.10 | 24 |
| 35  | S60        | 0.58   | 0.06 | 21 | S30        | 0.38   | 0.05 | 24 | S34        | 0.45   | 0.06 | 24 |
| 36  | S53        | 0.57   | 0.10 | 21 | S4         | 0.32   | 0.08 | 24 | S30        | 0.43   | 0.04 | 24 |
| 37  | S33        | 0.51   | 0.06 | 21 | S49        | 0.31   | 0.03 | 24 | S21        | 0.38   | 0.06 | 24 |
| 38  | S46        | 0.51   | 0.09 | 21 | S21        | 0.26   | 0.03 | 24 | S31        | 0.37   | 0.18 | 24 |
| 39  | S31        | 0.50   | 0.14 | 21 | S40        | 0.23   | 0.05 | 24 | S40        | 0.31   | 0.09 | 24 |
| 40  | S23        | 0.44   | 0.08 | 21 | S36        | 0.19   | 0.05 | 24 | S49        | 0.31   | 0.03 | 24 |
| 41  | S4         | 0.40   | 0.13 | 21 | S43        | 0.18   | 0.04 | 24 | S3         | 0.29   | 0.09 | 24 |
| 42  | S51        | 0.39   | 0.05 | 21 | S23        | 0.17   | 0.03 | 24 | S36        | 0.28   | 0.09 | 24 |
| 43  | S52        | 0.37   | 0.09 | 21 | S3         | 0.16   | 0.05 | 24 | S43        | 0.25   | 0.07 | 24 |
| 44  | S34        | 0.35   | 0.05 | 21 | S31        | 0.16   | 0.06 | 24 | S46        | 0.24   | 0.03 | 24 |
| 45  | S61        | 0.34   | 0.07 | 21 | S33        | 0.16   | 0.03 | 24 | S33        | 0.22   | 0.06 | 24 |
| 46  | S30        | 0.19   | 0.03 | 21 | S51        | 0.10   | 0.02 | 24 | S16        | 0.21   | 0.06 | 24 |
| 47  | S6         | 0.18   | 0.04 | 21 | S8         | 0.09   | 0.03 | 24 | S8         | 0.21   | 0.05 | 24 |
| 48  | S38        | 0.16   | 0.04 | 21 | S53        | 0.09   | 0.01 | 24 | S6         | 0.15   | 0.02 | 24 |
| 49  | S40        | 0.16   | 0.04 | 21 | S16        | 0.09   | 0.02 | 24 | S51        | 0.13   | 0.03 | 24 |
| 50  | S36        | 0.11   | 0.02 | 21 | S38        | 0.08   | 0.01 | 24 | S38        | 0.11   | 0.02 | 24 |
| 51  | S35        | 0.10   | 0.02 | 21 | S6         | 0.08   | 0.01 | 24 | S53        | 0.10   | 0.02 | 24 |
| 52  | S8         | 0.10   | 0.03 | 21 | S61        | 0.08   | 0.03 | 24 | S61        | 0.07   | 0.02 | 24 |
| 53  | S29        | 0.08   | 0.02 | 21 | S14        | 0.05   | 0.01 | 24 | S35        | 0.05   | 0.02 | 24 |
| 54  | S14        | 0.08   | 0.02 | 21 | S35        | 0.03   | 0.01 | 24 | S29        | 0.04   | 0.01 | 24 |
| 55  | S16        | 0.07   | 0.01 | 21 | S29        | 0.02   | 0.00 | 24 | S14        | 0.03   | 0.01 | 24 |
| 56  | S45        | 0.07   | 0.02 | 21 | S45        | 0.01   | 0.00 | 24 | S47        | 0.03   | 0.01 | 24 |
| 57  | S5         | 0.07   | 0.02 | 21 | S5         | 0.01   | 0.00 | 24 | S5         | 0.02   | 0.01 | 24 |
| 58  | S47        | 0.06   | 0.01 | 21 | S47        | 0.01   | 0.00 | 24 | S37        | 0.01   | 0.00 | 24 |
| 59  | S7         | 0.03   | 0.01 | 21 | S37        | 0.00   | 0.00 | 24 | S39        | 0.01   | 0.00 | 24 |
| 60  | S15        | 0.03   | 0.01 | 21 | S39        | 0.00   | 0.00 | 24 | S7         | 0.01   | 0.00 | 24 |
| 61  | S37        | 0.02   | 0.01 | 21 | S7         | 0.00   | 0.00 | 24 | S45        | 0.01   | 0.00 | 24 |
| 62  | S39        | 0.02   | 0.01 | 21 | S15        | 0.00   | 0.00 | 24 | S15        | 0.01   | 0.00 | 24 |
| 63  | S13        | 0.01   | 0.00 | 21 | S13        | 0.00   | 0.00 | 24 | S13        | 0.00   | 0.00 | 24 |

table S9

| Top | 4T07 D7    |        |      |    | 4T07 D14   |        |      |    | 4T07 D21   |        |      |    |
|-----|------------|--------|------|----|------------|--------|------|----|------------|--------|------|----|
|     | CAF subset | Mean % | SEM  | n  | CAF subset | Mean % | SEM  | n  | CAF subset | Mean % | SEM  | n  |
| 1   | S32        | 14.44  | 1.94 | 24 | S56        | 17.73  | 1.08 | 21 | S56        | 16.88  | 1.21 | 14 |
| 2   | S56        | 9.48   | 0.82 | 24 | S32        | 17.32  | 2.50 | 21 | S32        | 13.72  | 2.49 | 14 |
| 3   | S22        | 9.39   | 1.05 | 24 | S24        | 12.32  | 1.61 | 21 | S63        | 13.69  | 4.41 | 14 |
| 4   | S24        | 7.23   | 0.94 | 24 | S22        | 9.88   | 1.43 | 21 | S24        | 8.95   | 1.49 | 14 |
| 5   | S63        | 6.49   | 2.62 | 24 | S63        | 6.03   | 3.02 | 21 | S22        | 8.91   | 1.89 | 14 |
| 6   | S17        | 5.33   | 0.48 | 24 | S54        | 4.70   | 1.02 | 21 | S54        | 7.66   | 1.82 | 14 |
| 7   | S54        | 4.52   | 0.52 | 24 | S27        | 3.56   | 0.84 | 21 | S27        | 2.45   | 0.72 | 14 |
| 8   | S9         | 4.48   | 0.60 | 24 | S17        | 3.29   | 0.56 | 21 | S55        | 2.31   | 0.70 | 14 |
| 9   | S25        | 3.55   | 0.52 | 24 | S19        | 1.94   | 0.42 | 21 | S17        | 2.10   | 0.42 | 14 |
| 10  | S1         | 3.15   | 0.59 | 24 | S18        | 1.88   | 0.24 | 21 | S62        | 1.72   | 0.40 | 14 |
| 11  | S10        | 2.97   | 0.57 | 24 | S1         | 1.59   | 0.30 | 21 | S21        | 1.17   | 0.24 | 14 |
| 12  | S27        | 2.96   | 0.52 | 24 | S55        | 1.52   | 0.48 | 21 | S25        | 1.13   | 0.34 | 14 |
| 13  | S18        | 2.07   | 0.21 | 24 | S20        | 1.33   | 0.19 | 21 | S19        | 1.12   | 0.29 | 14 |
| 14  | S2         | 1.78   | 0.16 | 24 | S25        | 1.16   | 0.18 | 21 | S31        | 1.06   | 0.41 | 14 |
| 15  | S57        | 1.70   | 0.31 | 24 | S2         | 1.09   | 0.15 | 21 | S23        | 1.02   | 0.20 | 14 |
| 16  | S19        | 1.52   | 0.22 | 24 | S28        | 0.97   | 0.22 | 21 | S42        | 0.99   | 0.37 | 14 |
| 17  | S62        | 1.36   | 0.12 | 24 | S62        | 0.89   | 0.16 | 21 | S18        | 0.91   | 0.11 | 14 |
| 18  | S55        | 1.18   | 0.46 | 24 | S9         | 0.88   | 0.17 | 21 | S41        | 0.84   | 0.20 | 14 |
| 19  | S41        | 1.04   | 0.20 | 24 | S52        | 0.71   | 0.10 | 21 | S61        | 0.80   | 0.18 | 14 |
| 20  | S59        | 1.02   | 0.17 | 24 | S21        | 0.69   | 0.19 | 21 | S1         | 0.76   | 0.17 | 14 |
| 21  | S11        | 0.94   | 0.19 | 24 | S11        | 0.61   | 0.14 | 21 | S59        | 0.71   | 0.17 | 14 |
| 22  | S28        | 0.88   | 0.13 | 24 | S60        | 0.57   | 0.10 | 21 | S9         | 0.71   | 0.24 | 14 |
| 23  | S26        | 0.87   | 0.19 | 24 | S10        | 0.56   | 0.13 | 21 | S50        | 0.68   | 0.13 | 14 |
| 24  | S49        | 0.77   | 0.09 | 24 | S41        | 0.55   | 0.11 | 21 | S20        | 0.66   | 0.10 | 14 |
| 25  | S21        | 0.76   | 0.09 | 24 | S42        | 0.55   | 0.16 | 21 | S57        | 0.63   | 0.12 | 14 |
| 26  | S42        | 0.74   | 0.12 | 24 | S50        | 0.54   | 0.12 | 21 | S44        | 0.62   | 0.20 | 14 |
| 27  | S20        | 0.72   | 0.09 | 24 | S23        | 0.53   | 0.08 | 21 | S60        | 0.62   | 0.14 | 14 |
| 28  | S12        | 0.69   | 0.11 | 24 | S31        | 0.48   | 0.14 | 21 | S48        | 0.59   | 0.27 | 14 |
| 29  | S48        | 0.66   | 0.12 | 24 | S3         | 0.45   | 0.12 | 21 | S49        | 0.58   | 0.10 | 14 |
| 30  | S23        | 0.62   | 0.08 | 24 | S57        | 0.44   | 0.08 | 21 | S58        | 0.58   | 0.20 | 14 |
| 31  | S53        | 0.52   | 0.17 | 24 | S59        | 0.43   | 0.07 | 21 | S28        | 0.57   | 0.17 | 14 |
| 32  | S61        | 0.51   | 0.11 | 24 | S12        | 0.36   | 0.06 | 21 | S53        | 0.56   | 0.11 | 14 |
| 33  | S58        | 0.44   | 0.10 | 24 | S61        | 0.36   | 0.09 | 21 | S10        | 0.53   | 0.21 | 14 |
| 34  | S30        | 0.43   | 0.07 | 24 | S44        | 0.35   | 0.05 | 21 | S2         | 0.39   | 0.08 | 14 |
| 35  | S31        | 0.43   | 0.09 | 24 | S49        | 0.35   | 0.06 | 21 | S11        | 0.33   | 0.10 | 14 |
| 36  | S50        | 0.41   | 0.06 | 24 | S34        | 0.31   | 0.05 | 21 | S52        | 0.32   | 0.06 | 14 |
| 37  | S6         | 0.40   | 0.15 | 24 | S48        | 0.29   | 0.07 | 21 | S51        | 0.31   | 0.11 | 14 |
| 38  | S60        | 0.35   | 0.07 | 24 | S51        | 0.28   | 0.08 | 21 | S26        | 0.29   | 0.10 | 14 |
| 39  | S51        | 0.31   | 0.07 | 24 | S30        | 0.27   | 0.06 | 21 | S12        | 0.25   | 0.07 | 14 |
| 40  | S3         | 0.27   | 0.06 | 24 | S26        | 0.26   | 0.05 | 21 | S34        | 0.24   | 0.06 | 14 |
| 41  | S46        | 0.27   | 0.03 | 24 | S4         | 0.25   | 0.07 | 21 | S30        | 0.23   | 0.06 | 14 |
| 42  | S44        | 0.26   | 0.05 | 24 | S53        | 0.24   | 0.04 | 21 | S33        | 0.21   | 0.05 | 14 |
| 43  | S33        | 0.25   | 0.03 | 24 | S58        | 0.23   | 0.05 | 21 | S43        | 0.20   | 0.06 | 14 |
| 44  | S34        | 0.24   | 0.03 | 24 | S33        | 0.23   | 0.04 | 21 | S3         | 0.19   | 0.10 | 14 |
| 45  | S4         | 0.22   | 0.05 | 24 | S43        | 0.20   | 0.04 | 21 | S29        | 0.09   | 0.05 | 14 |
| 46  | S52        | 0.22   | 0.03 | 24 | S6         | 0.16   | 0.07 | 21 | S46        | 0.09   | 0.02 | 14 |
| 47  | S43        | 0.22   | 0.04 | 24 | S36        | 0.12   | 0.02 | 21 | S4         | 0.09   | 0.03 | 14 |
| 48  | S38        | 0.18   | 0.08 | 24 | S40        | 0.08   | 0.01 | 21 | S36        | 0.08   | 0.03 | 14 |
| 49  | S40        | 0.17   | 0.04 | 24 | S8         | 0.08   | 0.02 | 21 | S6         | 0.07   | 0.02 | 14 |
| 50  | S29        | 0.14   | 0.03 | 24 | S29        | 0.07   | 0.02 | 21 | S7         | 0.06   | 0.06 | 14 |
| 51  | S8         | 0.09   | 0.02 | 24 | S38        | 0.07   | 0.02 | 21 | S38        | 0.05   | 0.02 | 14 |
| 52  | S16        | 0.08   | 0.01 | 24 | S35        | 0.06   | 0.02 | 21 | S40        | 0.05   | 0.02 | 14 |
| 53  | S36        | 0.08   | 0.01 | 24 | S46        | 0.06   | 0.02 | 21 | S47        | 0.05   | 0.03 | 14 |
| 54  | S14        | 0.06   | 0.01 | 24 | S16        | 0.05   | 0.02 | 21 | S5         | 0.05   | 0.03 | 14 |
| 55  | S35        | 0.04   | 0.01 | 24 | S47        | 0.02   | 0.01 | 21 | S16        | 0.04   | 0.02 | 14 |
| 56  | S45        | 0.03   | 0.01 | 24 | S39        | 0.01   | 0.01 | 21 | S8         | 0.04   | 0.01 | 14 |
| 57  | S47        | 0.02   | 0.00 | 24 | S14        | 0.01   | 0.00 | 21 | S35        | 0.02   | 0.01 | 14 |
| 58  | S5         | 0.02   | 0.00 | 24 | S7         | 0.01   | 0.00 | 21 | S14        | 0.02   | 0.01 | 14 |
| 59  | S15        | 0.01   | 0.00 | 24 | S5         | 0.01   | 0.00 | 21 | S45        | 0.02   | 0.00 | 14 |
| 60  | S13        | 0.01   | 0.00 | 24 | S15        | 0.01   | 0.00 | 21 | S15        | 0.01   | 0.01 | 14 |
| 61  | S37        | 0.01   | 0.00 | 24 | S45        | 0.01   | 0.00 | 21 | S39        | 0.01   | 0.00 | 14 |
| 62  | S7         | 0.01   | 0.00 | 24 | S13        | 0.00   | 0.00 | 21 | S37        | 0.01   | 0.00 | 14 |
| 63  | S39        | 0.00   | 0.00 | 24 | S37        | 0.00   | 0.00 | 21 | S13        | 0.00   | 0.00 | 14 |

table S10

| Multiple t-tests 4T1 vs 4T07 D7 |            |          |           |            |            |                  |         | Multiple t-tests 4T1 vs 4T07 D14 |            |            |          |           |            |            |                  | Multiple t-tests 4T1 vs 4T07 D21 |    |            |            |          |           |            |            |                  |         |    |
|---------------------------------|------------|----------|-----------|------------|------------|------------------|---------|----------------------------------|------------|------------|----------|-----------|------------|------------|------------------|----------------------------------|----|------------|------------|----------|-----------|------------|------------|------------------|---------|----|
| CAF subset                      | Discovery? | P value  | Mean1 4T1 | Mean2 4T07 | Difference | SE of difference | t ratio | df                               | CAF subset | Discovery? | P value  | Mean1 4T1 | Mean2 4T07 | Difference | SE of difference | t ratio                          | df | CAF subset | Discovery? | P value  | Mean1 4T1 | Mean2 4T07 | Difference | SE of difference | t ratio | df |
| S1                              |            | 0.67028  | 3.55      | 3.15       | 0.41       | 0.94             | 0.429   | 43                               | S1         |            | 0.86289  | 1.66      | 1.59       | 0.07       | 0.42             | 0.175                            | 43 | S1         |            | 0.066789 | 1.66      | 0.76       | 0.90       | 0.47             | 1.890   | 36 |
| S2                              |            | 0.115340 | 1.40      | 1.78       | -0.38      | 0.24             | 1.607   | 43                               | S2         |            | 0.005825 | 1.94      | 1.09       | 0.85       | 0.29             | 2.902                            | 43 | S2         | *          | 0.000003 | 1.97      | 0.39       | 1.58       | 0.29             | 5.503   | 36 |
| S3                              |            | 0.13867  | 0.59      | 0.27       | 0.31       | 0.19             | 1.614   | 43                               | S3         |            | 0.018291 | 0.16      | 0.45       | -0.29      | 0.12             | 2.453                            | 43 | S3         |            | 0.506516 | 0.29      | 0.19       | 0.09       | 0.14             | 0.671   | 36 |
| S4                              |            | 0.97771  | 0.40      | 0.22       | 0.17       | 0.13             | 1.308   | 43                               | S4         |            | 0.521111 | 0.32      | 0.25       | 0.07       | 0.11             | 0.647                            | 43 | S4         |            | 0.045289 | 0.46      | 0.09       | 0.38       | 0.18             | 2.074   | 36 |
| S5                              |            | 0.00619  | 0.07      | 0.02       | 0.05       | 0.02             | 2.884   | 43                               | S5         |            | 0.641022 | 0.01      | 0.01       | 0.00       | 0.00             | 0.470                            | 43 | S5         |            | 0.223138 | 0.02      | 0.05       | -0.03      | 0.02             | 1.240   | 36 |
| S6                              |            | 0.94937  | 0.18      | 0.40       | -0.22      | 0.17             | 1.317   | 43                               | S6         |            | 0.225444 | 0.08      | 0.16       | -0.08      | 0.07             | 1.231                            | 43 | S6         |            | 0.019330 | 0.15      | 0.07       | 0.09       | 0.03             | 2.648   | 36 |
| S7                              |            | 0.018639 | 0.03      | 0.01       | 0.02       | 0.01             | 2.445   | 43                               | S7         |            | 0.066966 | 0.00      | 0.01       | -0.01      | 0.00             | 1.879                            | 43 | S7         |            | 0.211691 | 0.01      | 0.06       | -0.05      | 0.04             | 1.272   | 36 |
| S8                              |            | 0.775064 | 0.10      | 0.09       | 0.01       | 0.03             | 0.288   | 43                               | S8         |            | 0.672961 | 0.09      | 0.08       | 0.02       | 0.04             | 0.425                            | 43 | S8         |            | 0.079864 | 0.21      | 0.04       | 0.17       | 0.07             | 2.482   | 36 |
| S9                              |            | 0.750949 | 4.20      | 4.48       | -0.28      | 0.87             | 0.319   | 43                               | S9         |            | 0.053233 | 1.36      | 0.88       | 0.48       | 0.24             | 1.988                            | 43 | S9         |            | 0.038304 | 1.50      | 0.71       | 0.79       | 0.37             | 2.51    | 36 |
| S10                             |            | 0.332852 | 3.78      | 2.97       | 0.80       | 0.82             | 0.979   | 43                               | S10        | *          | 0.000009 | 3.84      | 0.56       | 3.28       | 0.65             | 5.047                            | 43 | S10        |            | 0.001291 | 2.97      | 0.53       | 2.44       | 0.70             | 3.491   | 36 |
| S11                             |            | 0.041256 | 1.92      | 0.94       | 0.98       | 0.47             | 2.104   | 43                               | S11        |            | 0.899971 | 0.58      | 0.61       | -0.03      | 0.22             | 0.126                            | 43 | S11        |            | 0.568885 | 0.59      | 0.33       | 0.26       | 0.18             | 1.446   | 36 |
| S12                             | *          | 0.001220 | 1.95      | 0.69       | 1.26       | 0.36             | 3.463   | 43                               | S12        | *          | 0.000014 | 2.07      | 0.36       | 1.70       | 0.35             | 4.905                            | 43 | S12        | *          | 0.000094 | 1.35      | 0.25       | 1.10       | 0.31             | 3.614   | 36 |
| S13                             |            | 0.708238 | 0.01      | 0.01       | 0.00       | 0.01             | 0.377   | 43                               | S13        |            | 0.439272 | 0.00      | 0.00       | 0.00       | 0.00             | 0.781                            | 43 | S13        |            | 0.839347 | 0.00      | 0.00       | 0.00       | 0.00             | 0.204   | 36 |
| S14                             |            | 0.384671 | 0.08      | 0.06       | 0.02       | 0.02             | 0.878   | 43                               | S14        | *          | 0.000169 | 0.05      | 0.01       | 0.04       | 0.01             | 4.140                            | 43 | S14        |            | 0.209145 | 0.03      | 0.02       | 0.01       | 0.01             | 1.279   | 36 |
| S15                             |            | 0.149474 | 0.03      | 0.01       | 0.01       | 0.01             | 1.468   | 43                               | S15        |            | 0.216424 | 0.00      | 0.01       | 0.00       | 0.00             | 1.255                            | 43 | S15        |            | 0.203697 | 0.01      | 0.01       | -0.01      | 0.01             | 1.295   | 36 |
| S16                             |            | 0.574243 | 0.07      | 0.08       | -0.01      | 0.02             | 0.566   | 43                               | S16        |            | 0.192132 | 0.09      | 0.05       | 0.04       | 0.03             | 1.325                            | 43 | S16        |            | 0.038017 | 0.21      | 0.04       | 0.17       | 0.08             | 2.54    | 36 |
| S17                             |            | 0.620748 | 5.82      | 5.33       | 0.48       | 0.97             | 0.498   | 43                               | S17        |            | 0.894037 | 3.39      | 3.29       | 0.10       | 0.76             | 0.134                            | 43 | S17        |            | 0.243631 | 2.72      | 2.10       | 0.62       | 0.52             | 1.85    | 36 |
| S18                             |            | 0.237856 | 1.74      | 2.07       | -0.33      | 0.28             | 1.197   | 43                               | S18        |            | 0.042731 | 2.49      | 1.88       | 0.62       | 0.30             | 2.088                            | 43 | S18        |            | 0.003042 | 2.09      | 0.91       | 1.18       | 0.37             | 3.78    | 36 |
| S19                             |            | 0.369887 | 2.02      | 1.52       | 0.50       | 0.55             | 0.906   | 43                               | S19        |            | 0.108571 | 1.14      | 1.94       | -0.80      | 0.49             | 1.639                            | 43 | S19        |            | 0.955422 | 1.10      | 1.12       | -0.02      | 0.35             | 0.056   | 36 |
| S20                             |            | 0.871153 | 0.70      | 0.72       | -0.02      | 0.15             | 0.83    | 43                               | S20        |            | 0.285773 | 1.05      | 1.33       | -0.28      | 0.26             | 1.081                            | 43 | S20        |            | 0.034774 | 1.17      | 0.66       | 0.51       | 0.23             | 2.14    | 36 |
| S21                             |            | 0.159622 | 1.04      | 0.76       | 0.28       | 0.20             | 1.431   | 43                               | S21        |            | 0.022461 | 0.26      | 0.69       | -0.43      | 0.18             | 2.368                            | 43 | S21        | *          | 0.000303 | 0.38      | 1.17       | -0.79      | 0.20             | 3.988   | 36 |
| S22                             |            | 0.072977 | 6.87      | 9.39       | -2.53      | 1.37             | 1.838   | 43                               | S22        |            | 0.798111 | 10.38     | 9.88       | 0.50       | 1.94             | 0.257                            | 43 | S22        |            | 0.164183 | 13.21     | 8.91       | 4.29       | 3.02             | 1.420   | 36 |
| S23                             |            | 0.123318 | 0.44      | 0.62       | -0.17      | 0.11             | 1.572   | 43                               | S23        | *          | 0.000080 | 0.17      | 0.53       | -0.36      | 0.08             | 4.359                            | 43 | S23        |            | 0.020824 | 0.57      | 1.02       | -0.45      | 0.19             | 2.417   | 36 |
| S24                             | *          | 0.001268 | 3.24      | 7.23       | -3.99      | 1.16             | 3.450   | 43                               | S24        |            | 0.025527 | 8.11      | 12.32      | -4.21      | 1.82             | 2.314                            | 43 | S24        |            | 0.230951 | 11.35     | 8.95       | 2.40       | 1.97             | 1.219   | 36 |
| S25                             |            | 0.14095  | 2.59      | 3.55       | -0.96      | 0.63             | 1.527   | 43                               | S25        |            | 0.069355 | 1.92      | 1.16       | 0.76       | 0.41             | 1.863                            | 43 | S25        |            | 0.124650 | 2.02      | 1.13       | 0.89       | 0.56             | 1.572   | 36 |
| S26                             |            | 0.463034 | 0.71      | 0.87       | -0.16      | 0.22             | 0.740   | 43                               | S26        | *          | 0.000081 | 0.85      | 0.26       | 0.59       | 0.13             | 4.356                            | 43 | S26        |            | 0.039129 | 0.64      | 0.29       | 0.35       | 0.16             | 2.141   | 36 |
| S27                             |            | 0.142809 | 4.83      | 2.96       | 1.87       | 1.25             | 1.494   | 43                               | S27        |            | 0.870810 | 3.78      | 3.56       | 0.23       | 1.38             | 0.164                            | 43 | S27        |            | 0.502708 | 1.92      | 2.45       | -0.53      | 0.78             | 0.677   | 36 |
| S28                             |            | 0.631965 | 1.00      | 0.88       | 0.12       | 0.24             | 0.482   | 43                               | S28        |            | 0.218536 | 1.46      | 0.97       | 0.49       | 0.39             | 1.249                            | 43 | S28        |            | 0.688840 | 0.64      | 0.57       | 0.07       | 0.17             | 0.406   | 36 |
| S29                             |            | 0.089995 | 0.08      | 0.14       | -0.06      | 0.03             | 1.757   | 43                               | S29        |            | 0.002540 | 0.02      | 0.07       | -0.05      | 0.02             | 3.206                            | 43 | S29        |            | 0.167042 | 0.04      | 0.09       | -0.06      | 0.04             | 1.410   | 36 |
| S30                             |            | 0.006813 | 0.19      | 0.43       | -0.23      | 0.08             | 2.843   | 43                               | S30        |            | 0.148259 | 0.38      | 0.27       | 0.11       | 0.07             | 1.472                            | 43 | S30        |            | 0.004817 | 0.43      | 0.23       | 0.21       | 0.07             | 3.005   | 36 |
| S31                             |            | 0.665055 | 0.50      | 0.43       | 0.07       | 0.16             | 0.436   | 43                               | S31        |            | 0.030607 | 0.16      | 0.48       | -0.32      | 0.14             | 2.236                            | 43 | S31        |            | 0.088126 | 0.37      | 1.06       | -0.68      | 0.39             | 1.753   | 36 |
| S32                             | *          | 0.000918 | 5.84      | 14.44      | -8.60      | 2.41             | 3.561   | 43                               | S32        |            | 0.832101 | 16.45     | 17.32      | -0.87      | 4.08             | 0.213                            | 43 | S32        |            | 0.669595 | 15.09     | 13.72      | 1.38       | 3.20             | 0.430   | 36 |
| S33                             | *          | 0.000139 | 0.51      | 0.25       | 0.26       | 0.06             | 4.183   | 43                               | S33        |            | 0.119713 | 0.16      | 0.23       | -0.08      | 0.05             | 1.588                            | 43 | S33        |            | 0.853266 | 0.22      | 0.21       | 0.02       | 0.08             | 0.186   | 36 |
| S34                             |            | 0.082846 | 0.35      | 0.24       | 0.10       | 0.06             | 1.776   | 43                               | S34        |            | 0.018420 | 0.48      | 0.31       | 0.17       | 0.07             | 2.450                            | 43 | S34        |            | 0.028409 | 0.45      | 0.24       | 0.21       | 0.09             | 2.283   | 36 |
| S35                             |            | 0.015673 | 0.10      | 0.04       | 0.06       | 0.02             | 2.516   | 43                               | S35        |            | 0.194486 | 0.03      | 0.06       | -0.03      | 0.02             | 1.318                            | 43 | S35        |            | 0.214440 | 0.05      | 0.02       | 0.03       | 0.02             | 1.264   | 36 |
| S36                             |            | 0.203425 | 0.11      | 0.08       | 0.03       | 0.02             | 1.221   | 43                               | S36        |            | 0.235245 | 0.19      | 0.12       | 0.07       | 0.06             | 1.204                            | 43 | S36        |            | 0.095830 | 0.28      | 0.08       | 0.20       | 0.12             | 1.710   | 36 |
| S37                             |            | 0.032380 | 0.02      | 0.01       | 0.01       | 0.01             | 2.112   | 43                               | S37        |            | 0.202029 | 0.00      | 0.00       | 0.00       | 0.00             | 1.296                            | 43 | S37        |            | 0.375778 | 0.01      | 0.01       | 0.01       | 0.01             | 0.897   | 36 |
| S38                             |            | 0.782050 | 0.16      | 0.18       | -0.03      | 0.10             | 0.278   | 43                               | S38        |            | 0.477959 | 0.08      | 0.07       | 0.01       | 0.02             | 0.716                            | 43 | S38        |            | 0.053825 | 0.11      | 0.05       | 0.06       | 0.03             | 1.994   | 36 |
| S39                             |            | 0.039842 | 0.02      | 0.00       | 0.01       | 0.01             | 2.120   | 43                               | S39        |            | 0.195444 | 0.00      | 0.01       | -0.01      | 0.01             | 1.315                            | 43 | S39        |            | 0.531654 | 0.01      | 0.01       | 0.00       | 0.01             | 0.632   | 36 |
| S40                             |            | 0.788940 | 0.16      | 0.17       | -0.02      | 0.06             | 0.269   | 43                               | S40        |            | 0.018852 | 0.23      | 0.08       | 0.15       | 0.06             | 2.566                            | 43 | S40        |            | 0.028662 | 0.31      | 0.05       | 0.26       | 0.11             | 2.311   | 36 |
| S41                             | *          | 0.000789 | 3.56      | 1.04       | 2.52       | 0.70             | 3.612   | 43                               | S41        |            | 0.321236 | 0.74      | 0.55       | 0.19       | 0.19             | 1.003                            | 43 | S41        |            | 0.104877 | 0.53      | 0.84       | -0.31      | 0.19             | 1.664   | 36 |
| S42                             | *          | 0.000322 | 2.44      | 0.74       | 1.69       | 0.43             | 3.911   | 43                               | S42        | *          | 0.001271 | 2.72      | 0.55       | 2.18       | 0.63             | 3.449                            | 43 | S42        |            | 0.126384 | 1.79      | 0.99       | 0.81       | 0.52             | 1.565   | 36 |
| S43                             | *          | 0.000008 | 0.67      | 0.22       | 0.45       | 0.09             | 5.074   | 43                               | S43        |            | 0.743423 | 0.18      | 0.20       | -0.02      | 0.05             | 0.329                            | 43 | S43        |            | 0.688055 | 0.25      | 0.20       | 0.04       | 0.10             | 0.407   | 36 |
| S44                             | *          | 0.000001 | 0.81      | 0.26       | 0.55       | 0.10             | 5.590   | 43                               | S44        |            | 0.006553 | 1.47      | 0.35       | 1.12       | 0.39             | 2.858                            | 43 | S44        |            | 0.162772 | 1.13      | 0.62       | 0.51       | 0.36             | 1.425   | 36 |
| S45                             |            | 0.044907 | 0.07      | 0.03       | 0.04       | 0.02             | 2.066   | 43                               | S45        |            | 0.225895 | 0.01      | 0.01       | 0.01       | 0.00             | 1.229                            | 43 | S45        |            | 0.060755 | 0.01      | 0.02       | -0.01      | 0.00             | 1.936   | 36 |
| S46                             |            | 0.010461 | 0.51      | 0.27       | 0.24       | 0.09             | 2.677   | 43                               | S46        | *          | 0.000007 | 0.45      | 0.06       | 0.39       | 0.08             | 5.109                            | 43 | S46        |            | 0.001589 | 0.24      | 0.09       | 0.15       | 0.05             | 3.416   | 36 |
| S47                             |            | 0.002508 | 0.06      | 0.02       | 0.03       | 0.01             | 3.211   | 43                               | S47        |            | 0.046365 | 0.01      | 0.02       | -0.02      | 0.01             | 2.051                            | 43 | S47        |            | 0.500512 | 0.03      | 0.05       | -0.02      | 0.02             | 0.681   | 36 |
| S48                             |            | 0.043457 | 1.16      | 0.66       | 0.51       | 0.24             | 2.081   | 43                               | S48        | *          | 0.000469 | 0.90      | 0.29       | 0.61       | 0.16             | 3.787                            | 43 | S48        |            | 0.252844 | 1.06      | 0.59       | 0.48       | 0.41             | 1.162   | 36 |
| S49                             | *          | 0.001231 | 1.28      | 0.77       | 0.51       | 0.15             | 3.460   | 43                               | S49        |            | 0.618470 | 0.31      | 0.35       | -0.03      | 0.06             | 0.502                            | 43 | S49        |            | 0.004597 | 0.31      | 0.58       | -0.27      | 0.09             | 3.023   | 36 |
| S50                             |            | 0.050778 | 0.61      | 0.41       | 0.20       | 0.10             | 2.010   | 43                               | S50        |            | 0.229197 | 0.70      | 0.54       | 0.16       | 0.13             | 1.220                            | 43 | S50        |            | 0.227580 | 0.53      | 0.68       | -0.15      | 0.12             | 1.228   | 36 |
| S51                             |            | 0.388689 | 0.39      | 0.31       | 0.08       | 0.09             | 0.871   | 43                               | S51        |            | 0.027193 | 0.10      | 0.28       | -0.18      | 0.08             | 2.287                            | 43 | S51        |            | 0.066808 | 0.13      | 0.31       | -0.17      | 0.09             | 1.8     |    |
